# Supplementary material
Source: MDPI journal article supplement (https://www.mdpi.com/1424-8247/16/6/781)
Supplement: s1 [file s1]

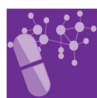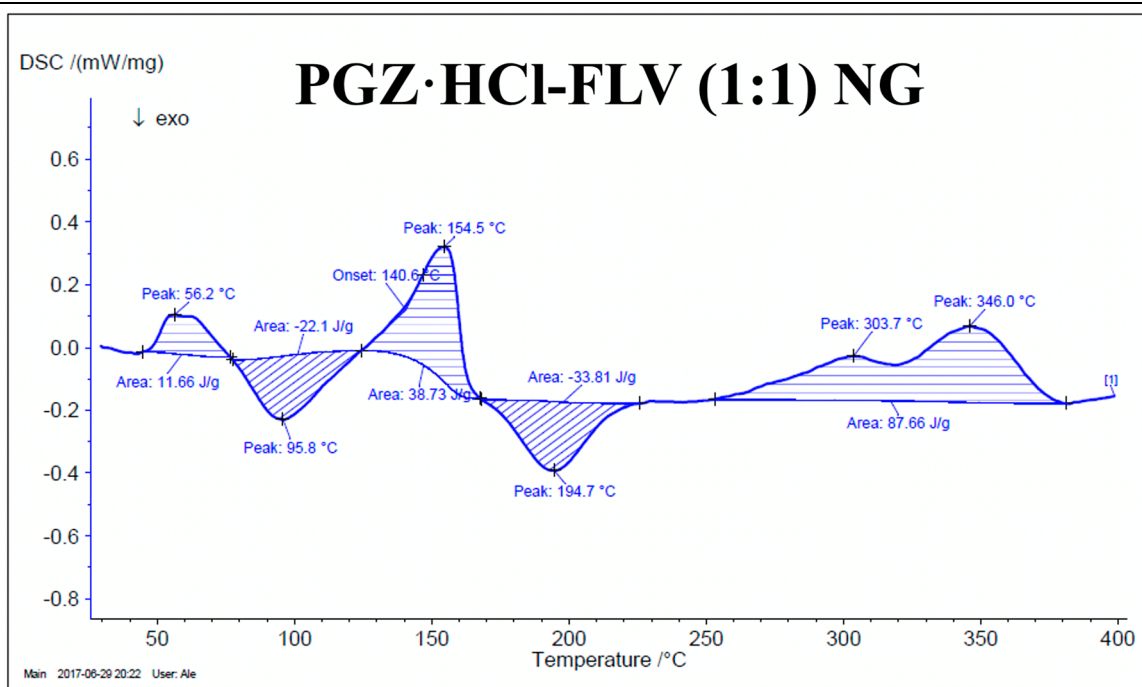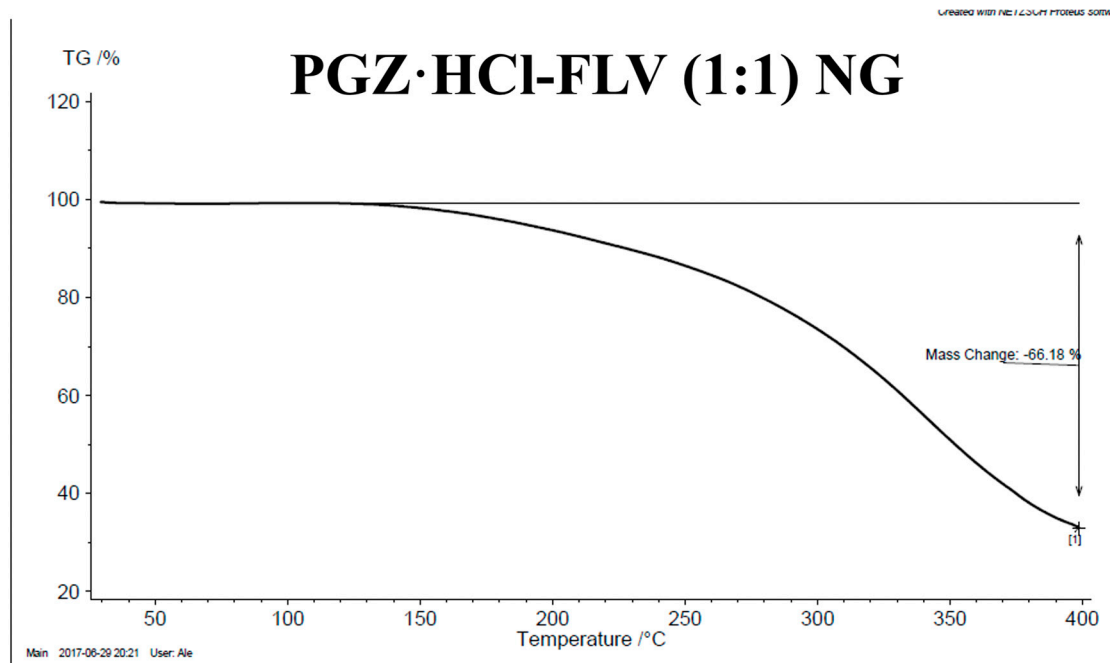

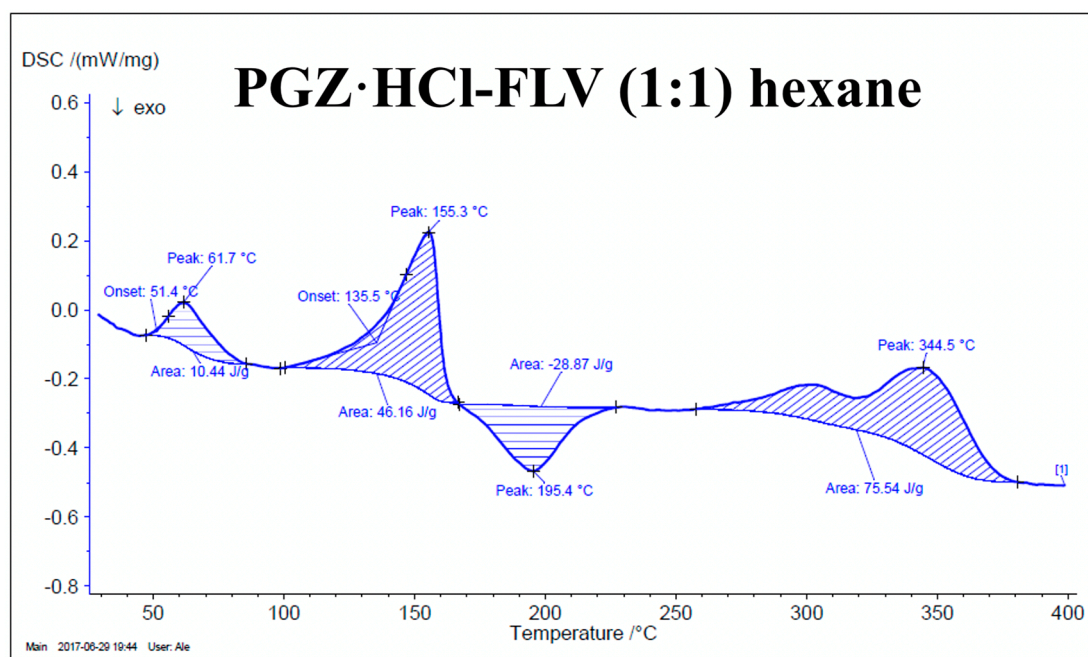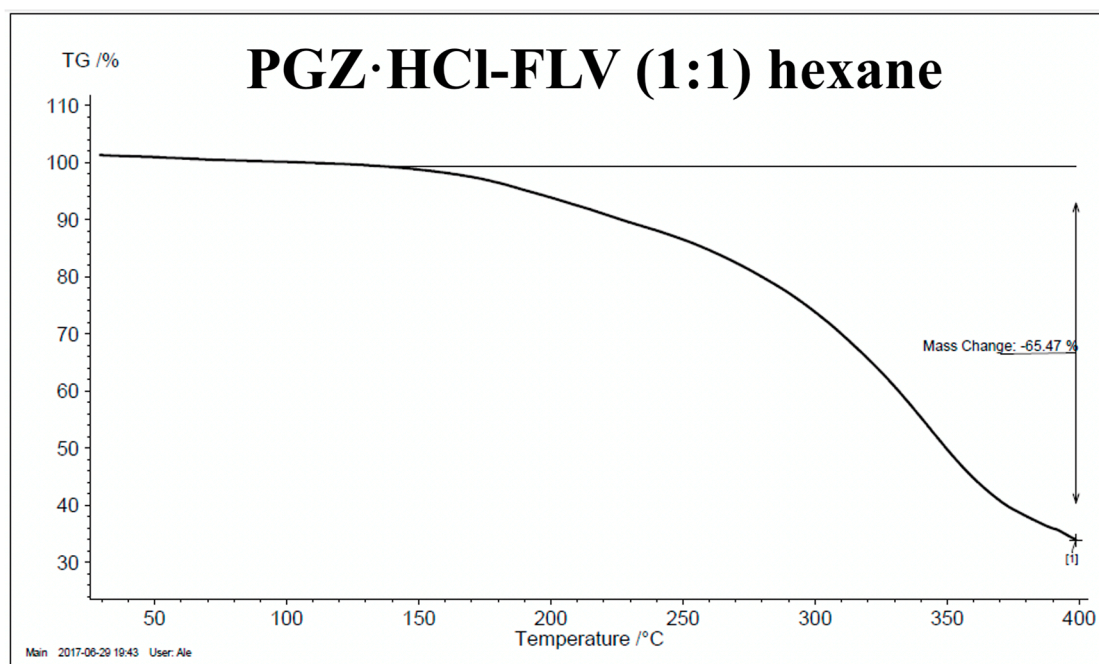

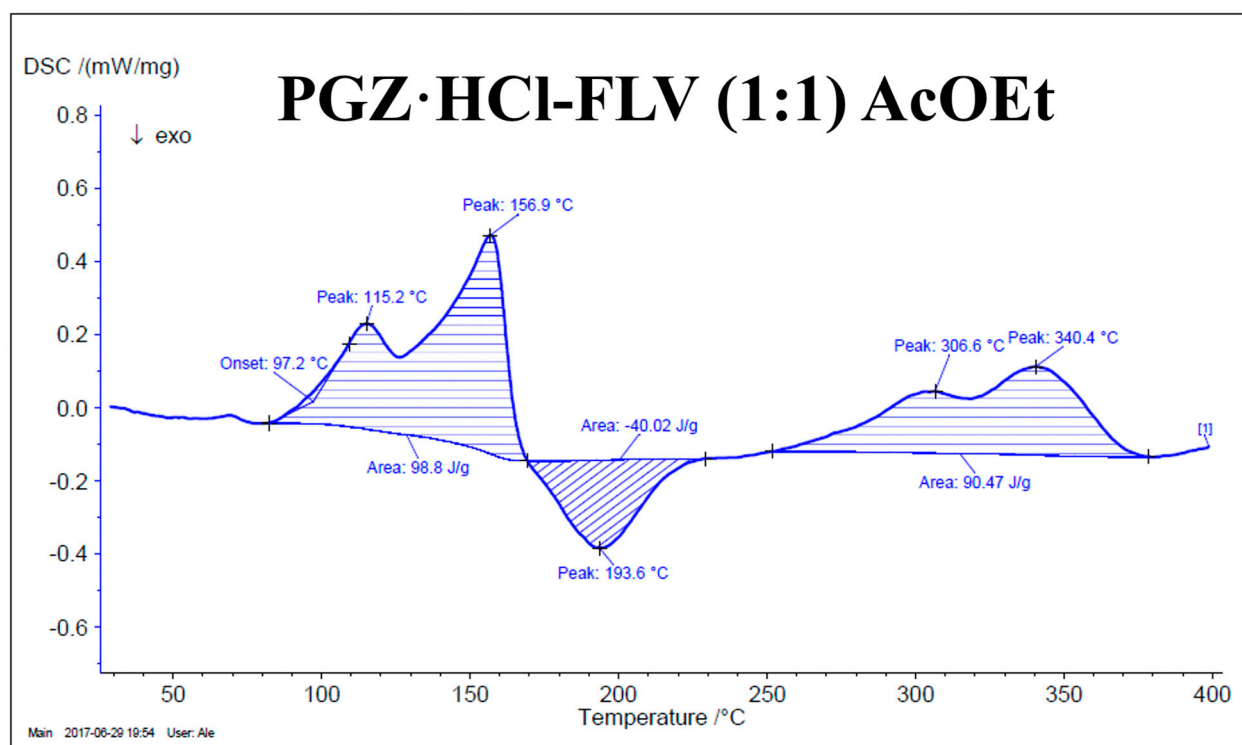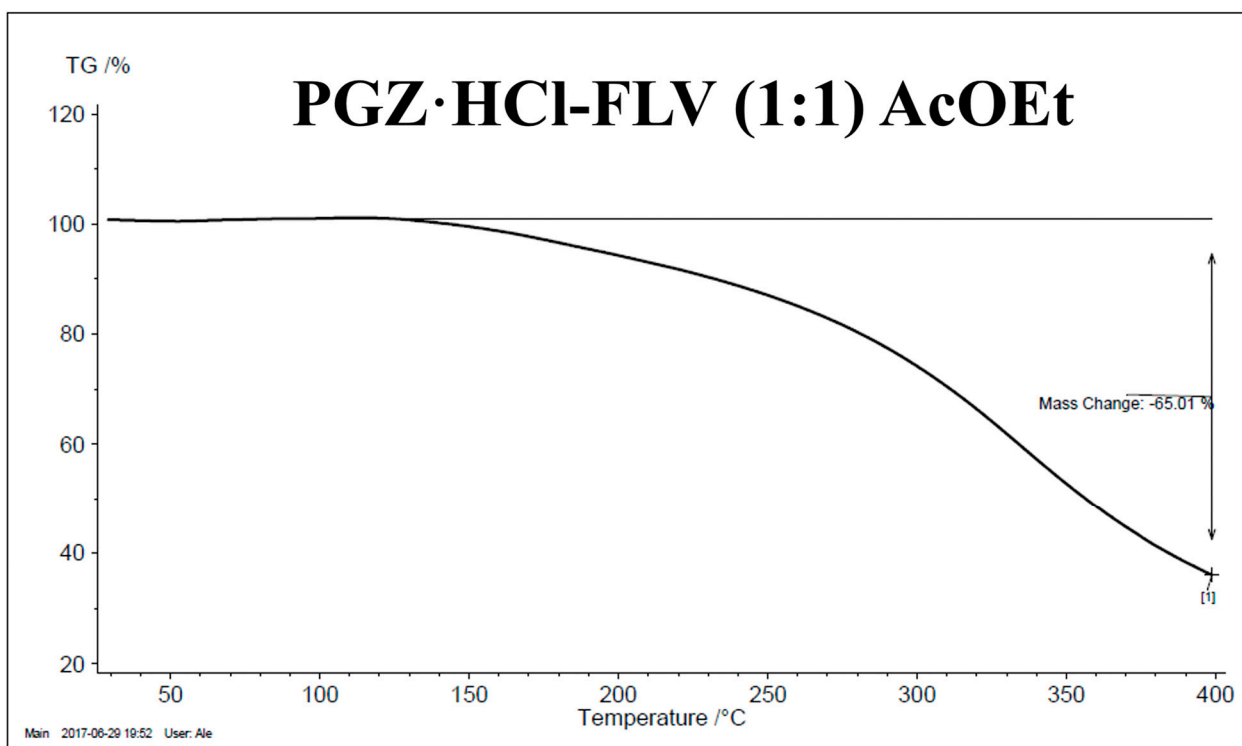

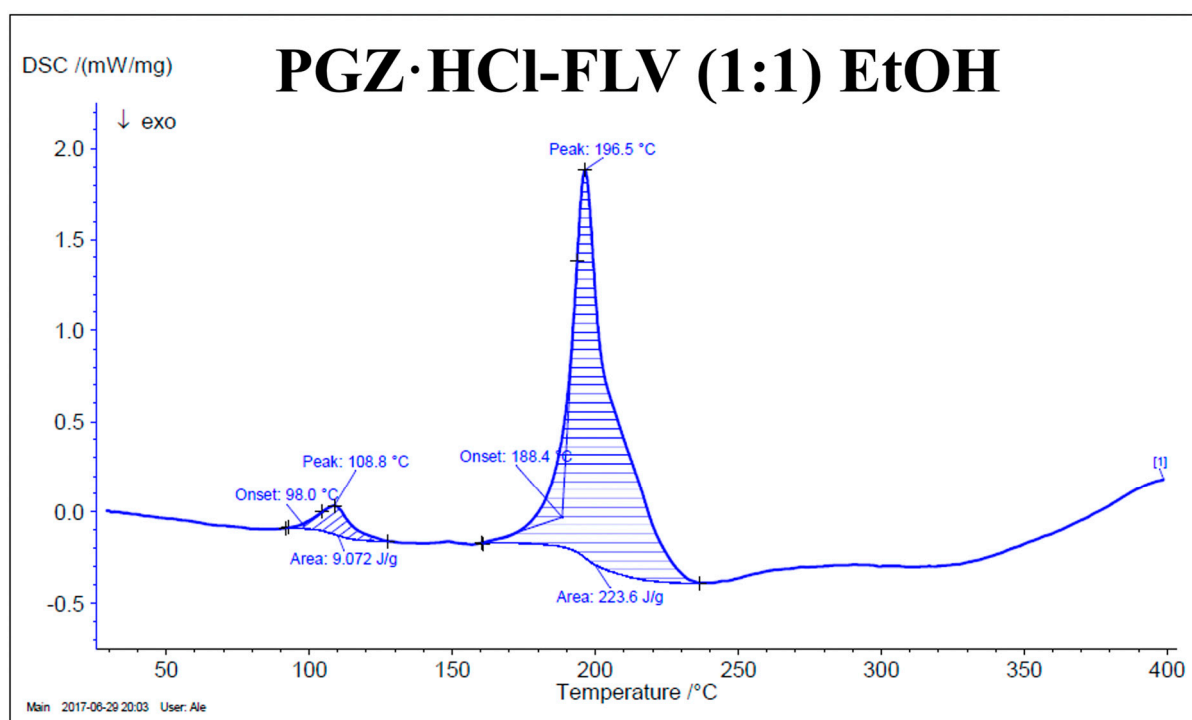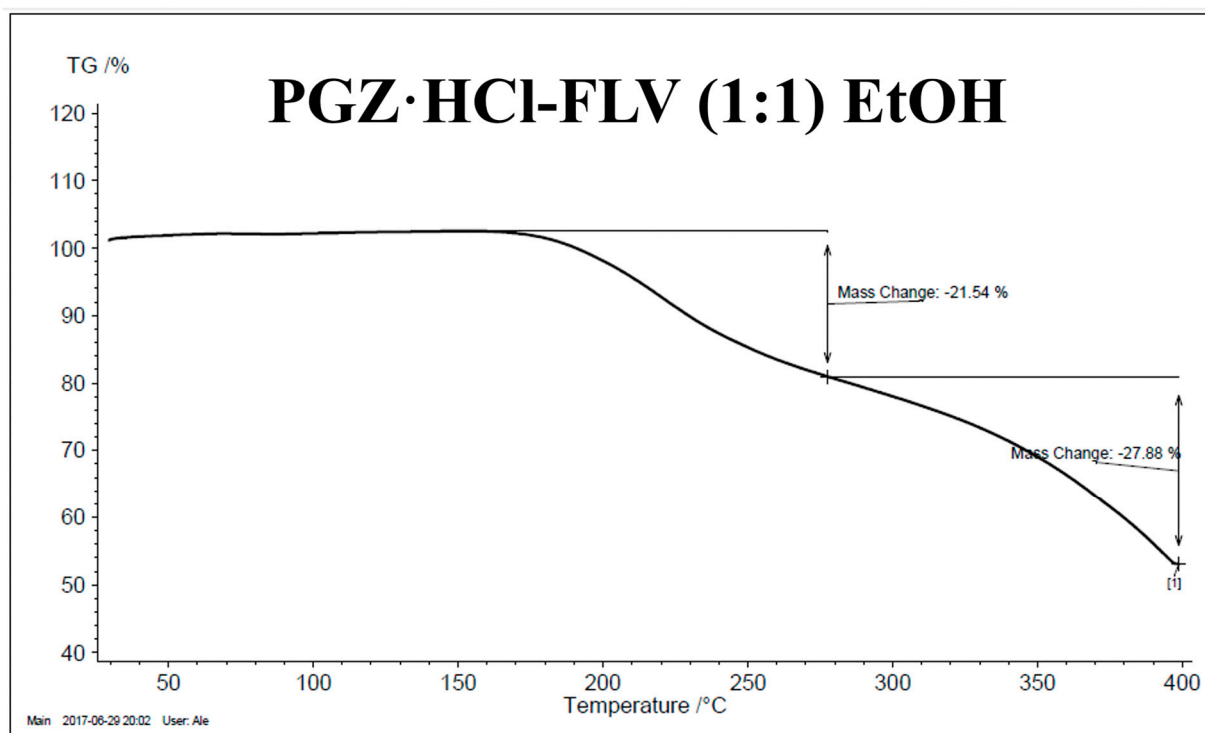

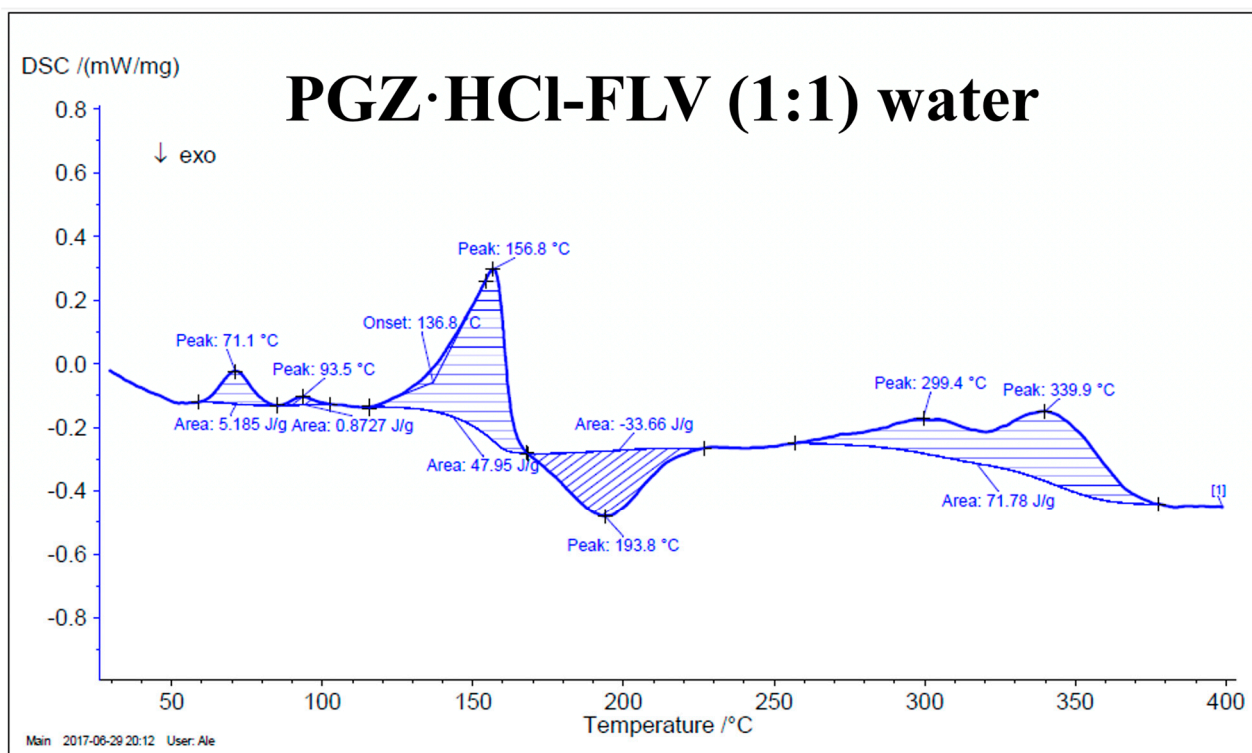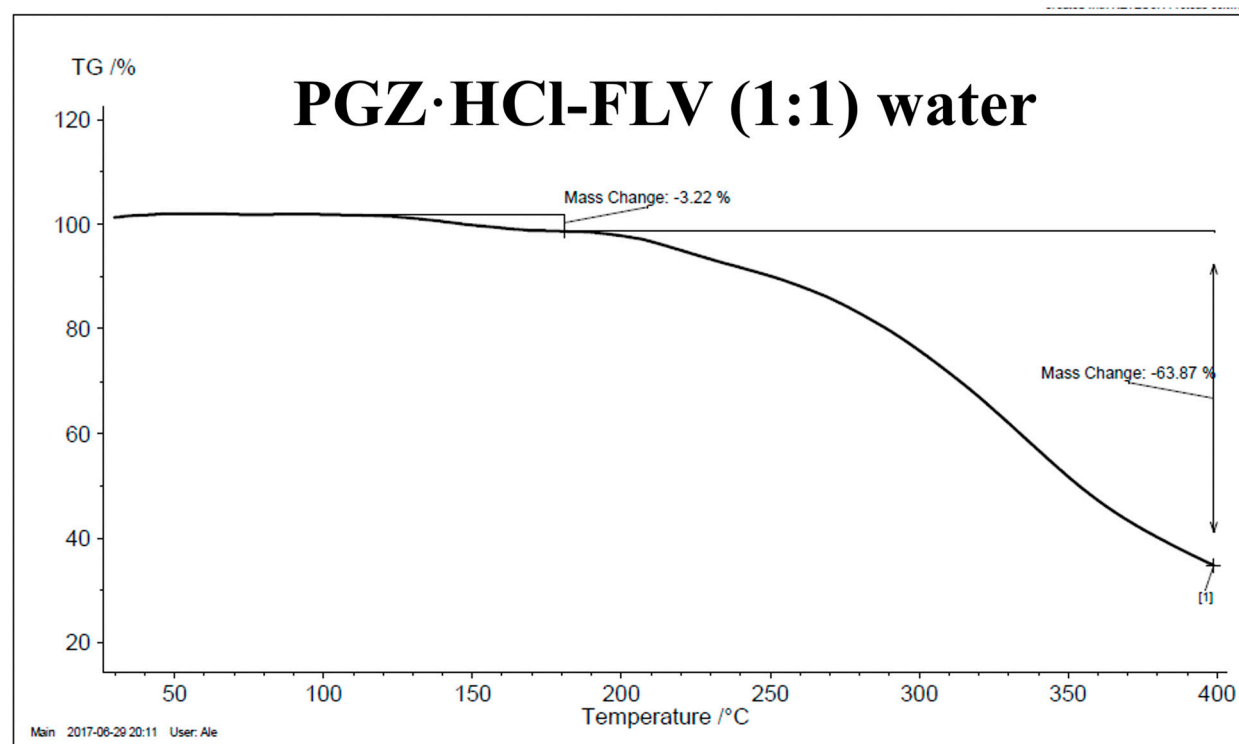

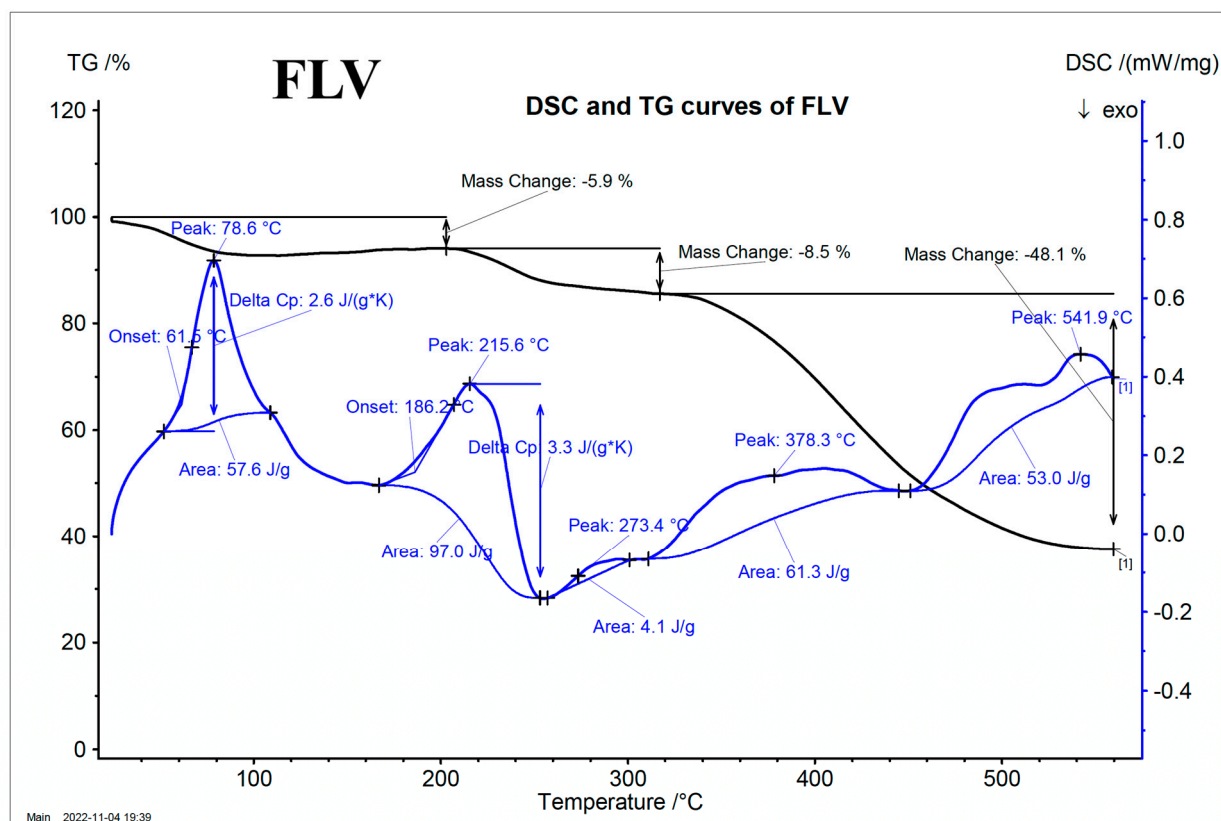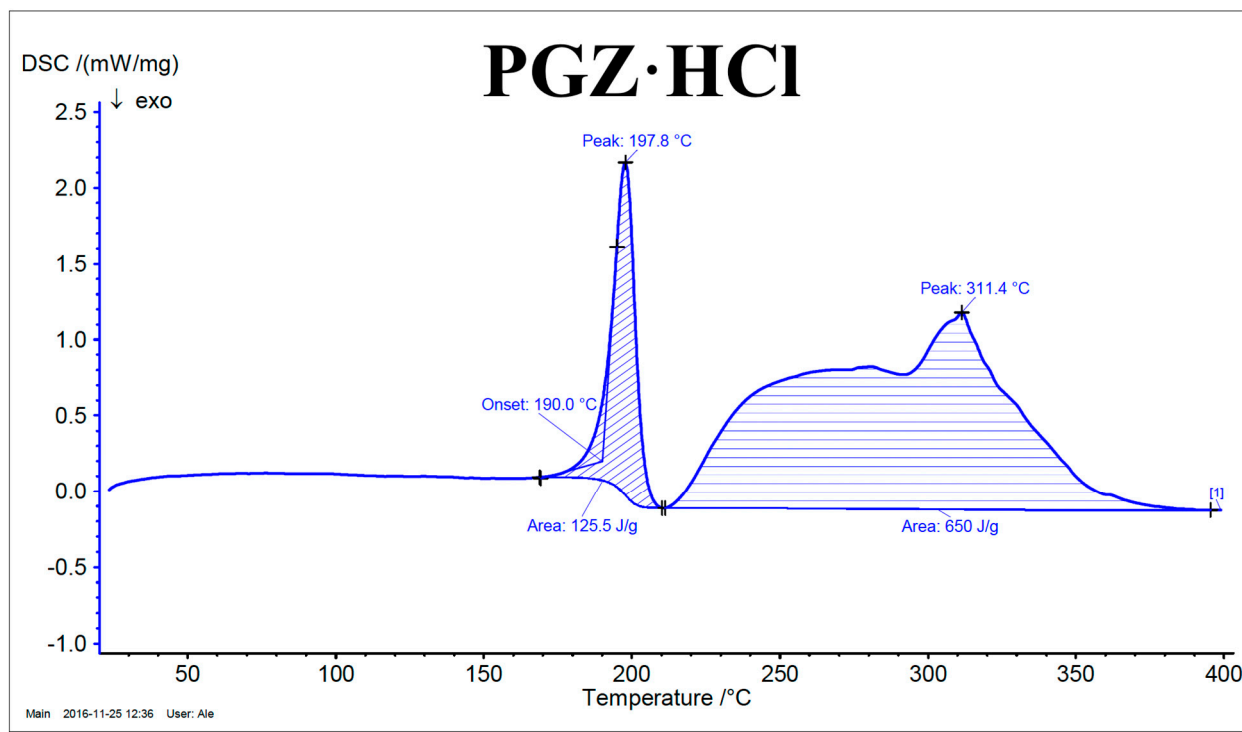

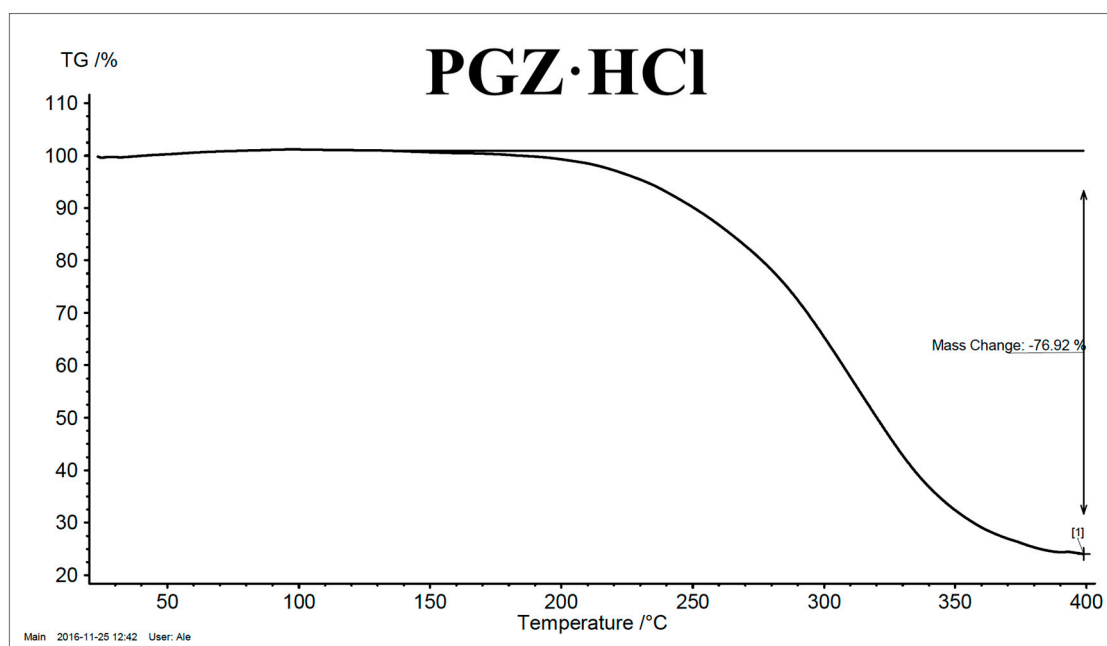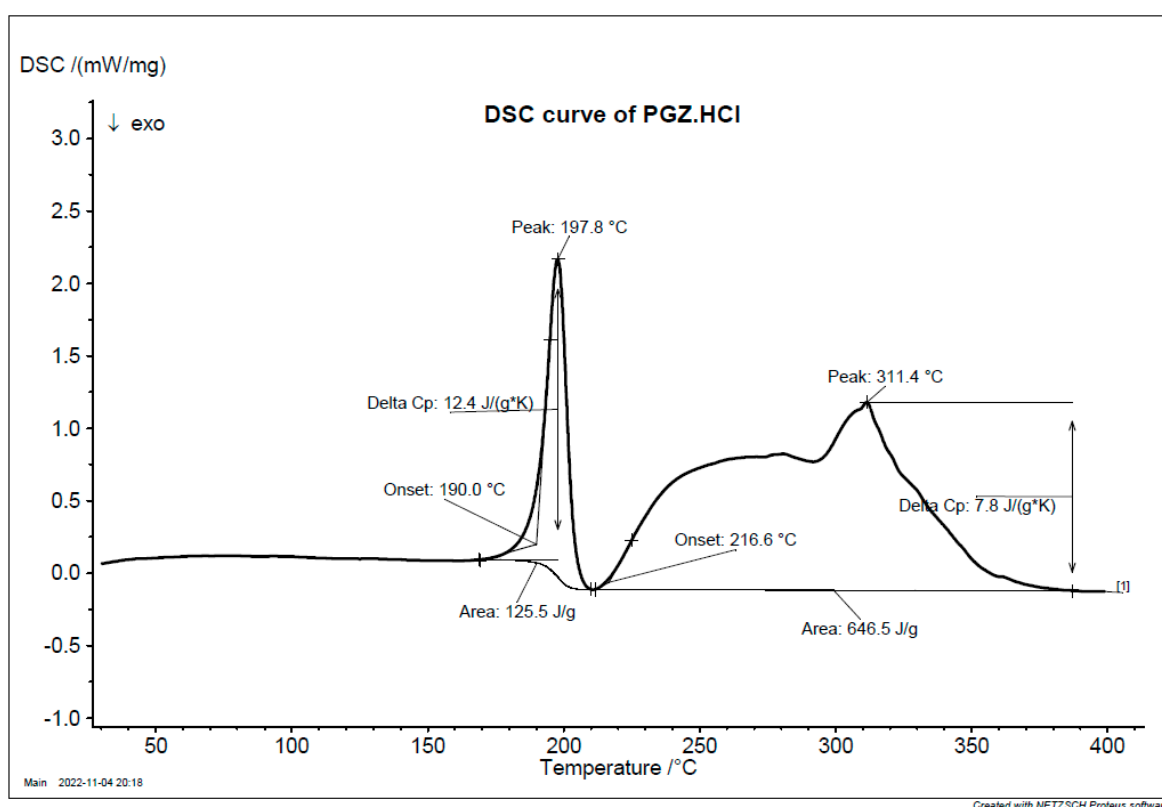

**Figure SM1.** Individual DSC-TGA thermograms of the solid phases PGZ·HCl-FLV (1:1) prepared by NG or LAG solvent-screening. Also, individual DSC-TGA thermograms of pure PGZ·HCl and FLV.

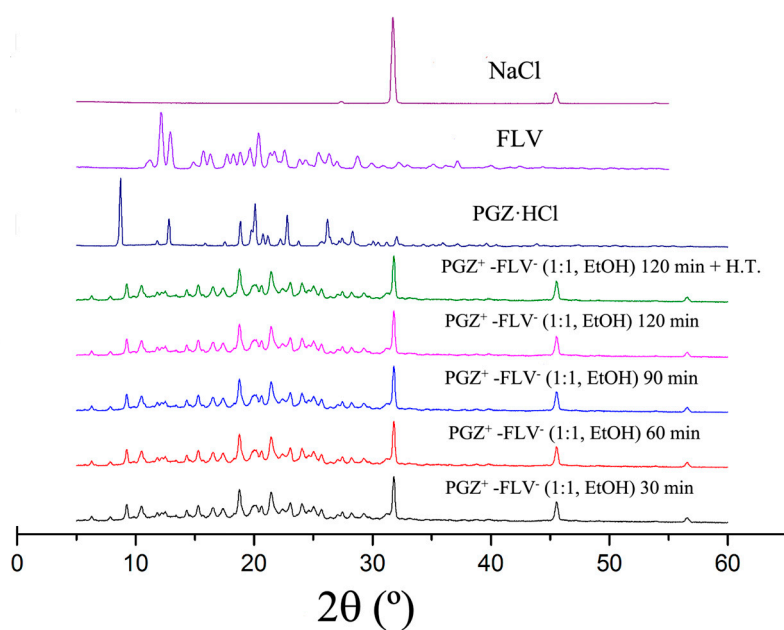

**Figure SM2.** Diffractograms of the salt PGZ<sup>+</sup>·FLV<sup>-</sup> (1:1, EtOH) extending the reaction times

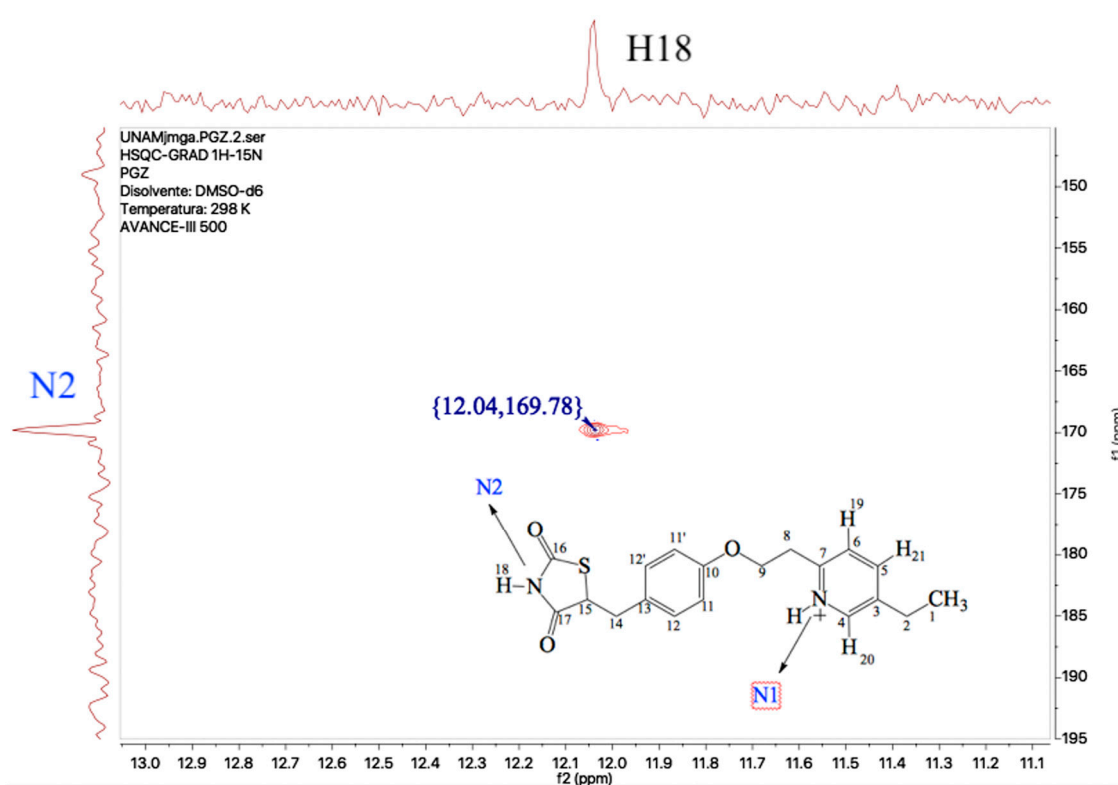

**Figure SM3.** HSQC <sup>1</sup>H-<sup>15</sup>N NMR spectrum of PGZ·HCl in d<sub>6</sub>-DMSO

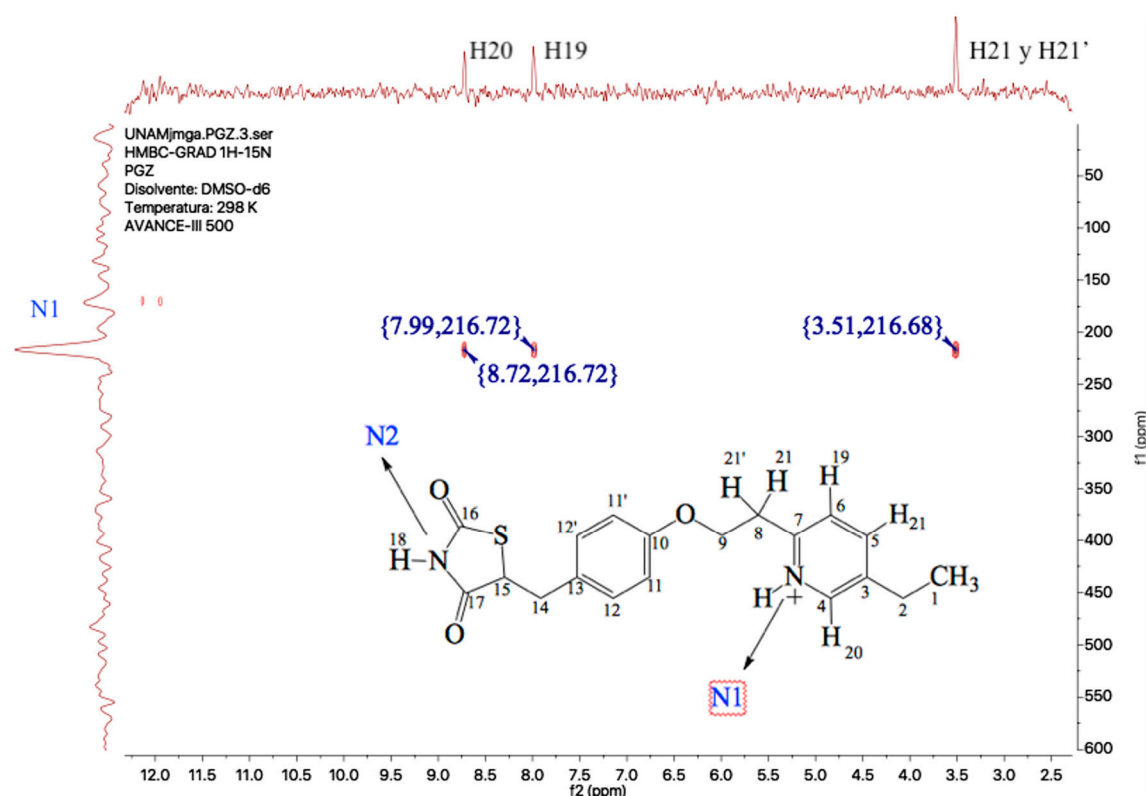

Figure SM4. HMBC  $^1\text{H}$ - $^{15}\text{N}$  NMR spectrum of PGZ·HCl in  $\text{d}_6$ -DMSO

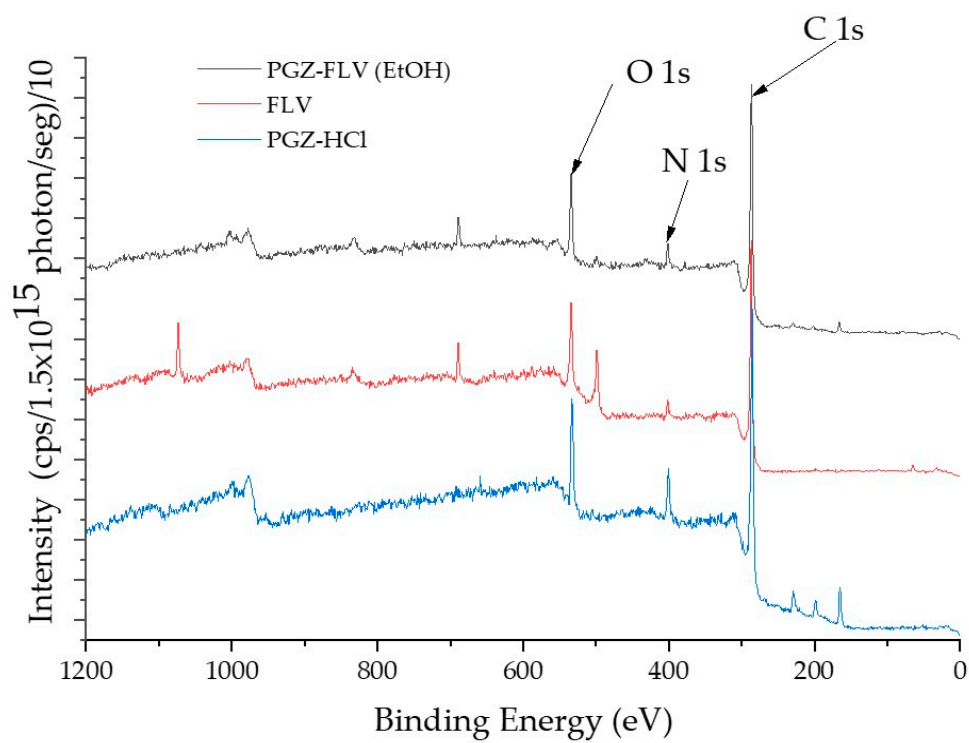

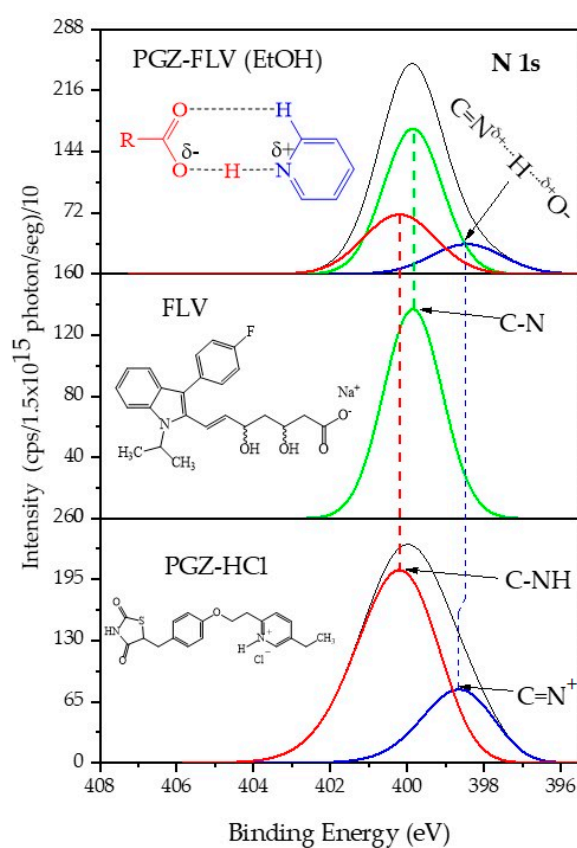

**Figure SM5.** XPS spectra of PGZHCl, FLV and the binary solid form (EtOH)

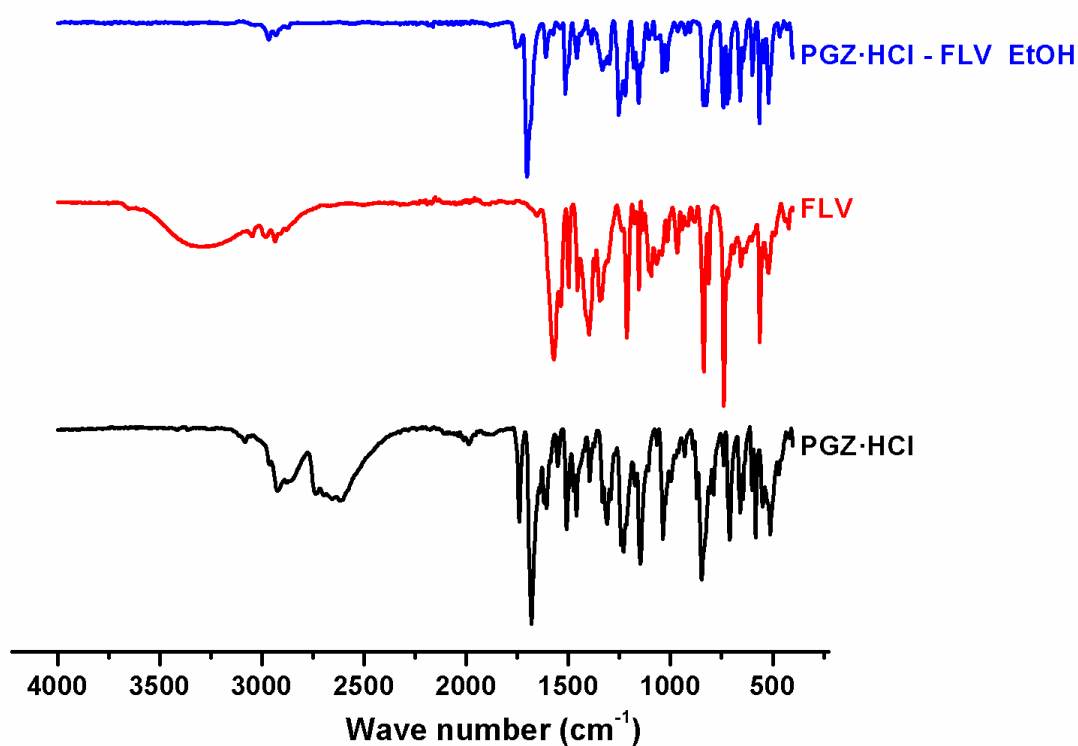

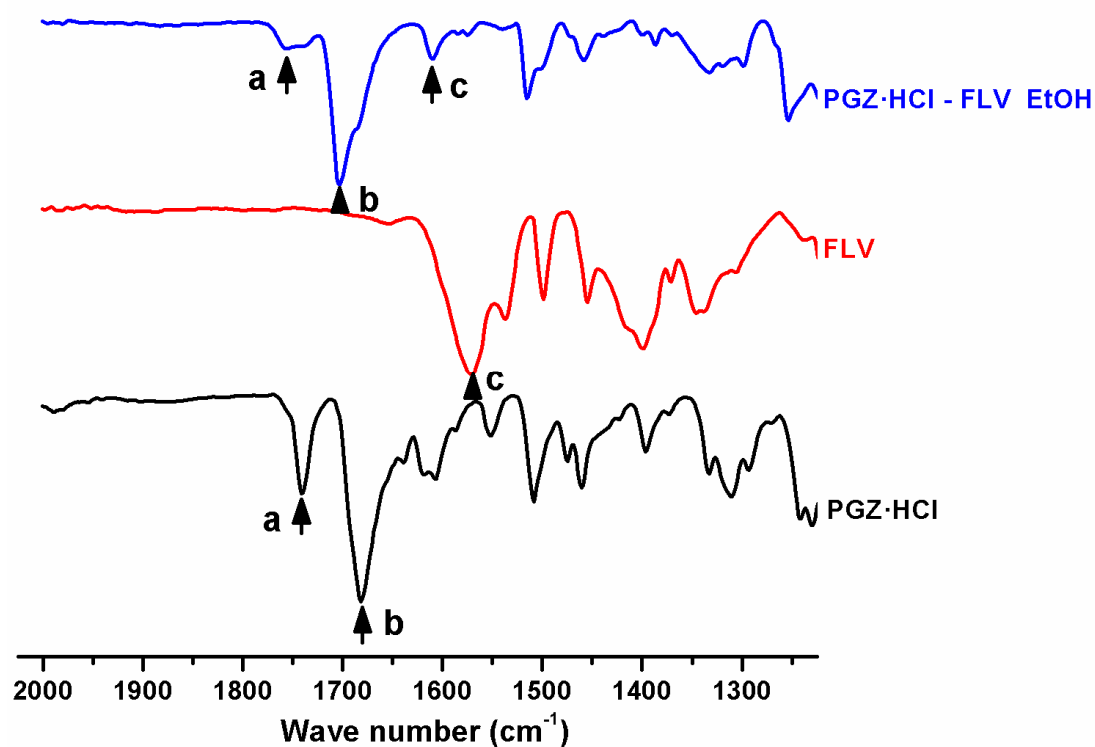

| Vibrational band assignment                                                                         | PGZ·HCl            | FLV     | PGZ·HCl-FLV (EtOH)           |
|-----------------------------------------------------------------------------------------------------|--------------------|---------|------------------------------|
| -C=O <sub>PGZ</sub> (a,b) ( $\Delta\nu$ cm <sup>-1</sup> )                                          | a: 1738<br>b: 1681 |         | a: 1756 (18)<br>b: 1702 (21) |
| -C=O <sub>FLV</sub> (c) ( $\Delta\nu$ cm <sup>-1</sup> )                                            |                    | c: 1571 | c: 1610 (39)                 |
| $ \Delta\nu$ cm <sup>-1</sup>   = vibration mode of pure drug - vibration mode of solid binary form |                    |         |                              |

**Figure SM6.** Full and extended PGZHCl, FLV, and PGZ-FLV (EtOH) FTIR spectra. Likewise, the table indicates the frequency values.

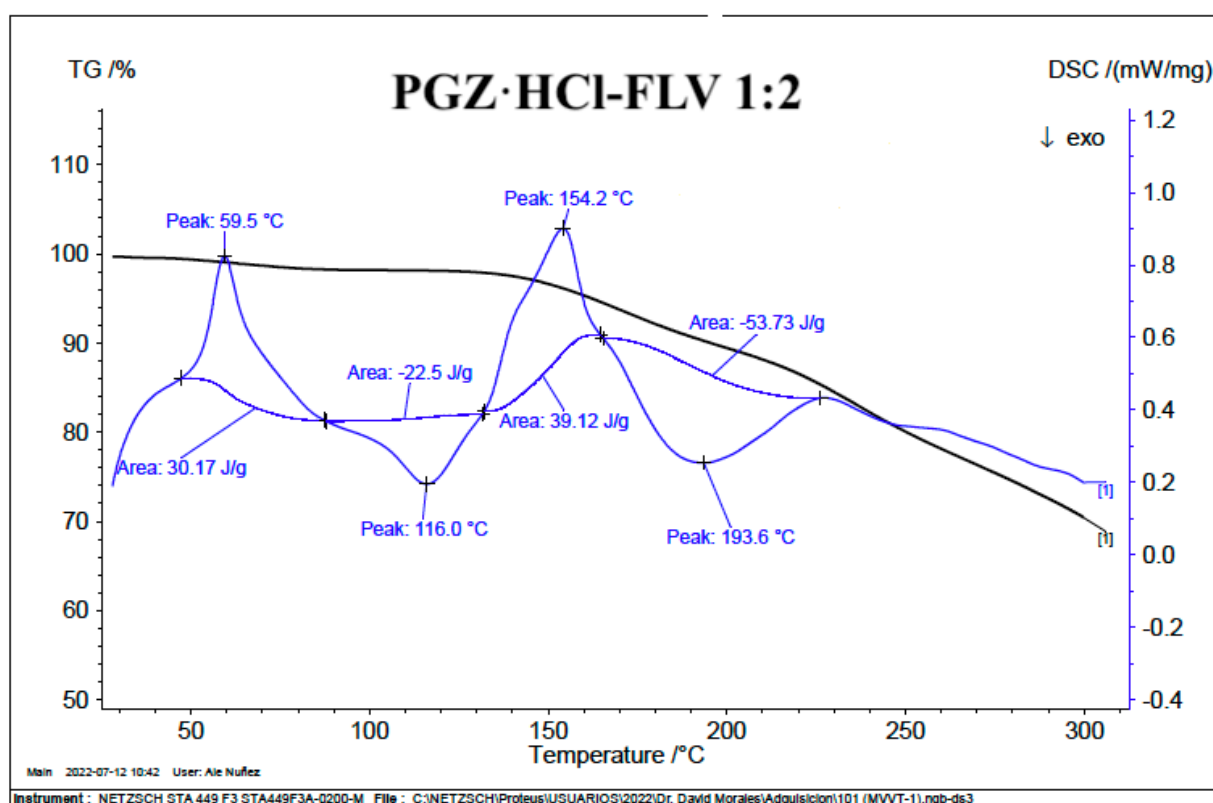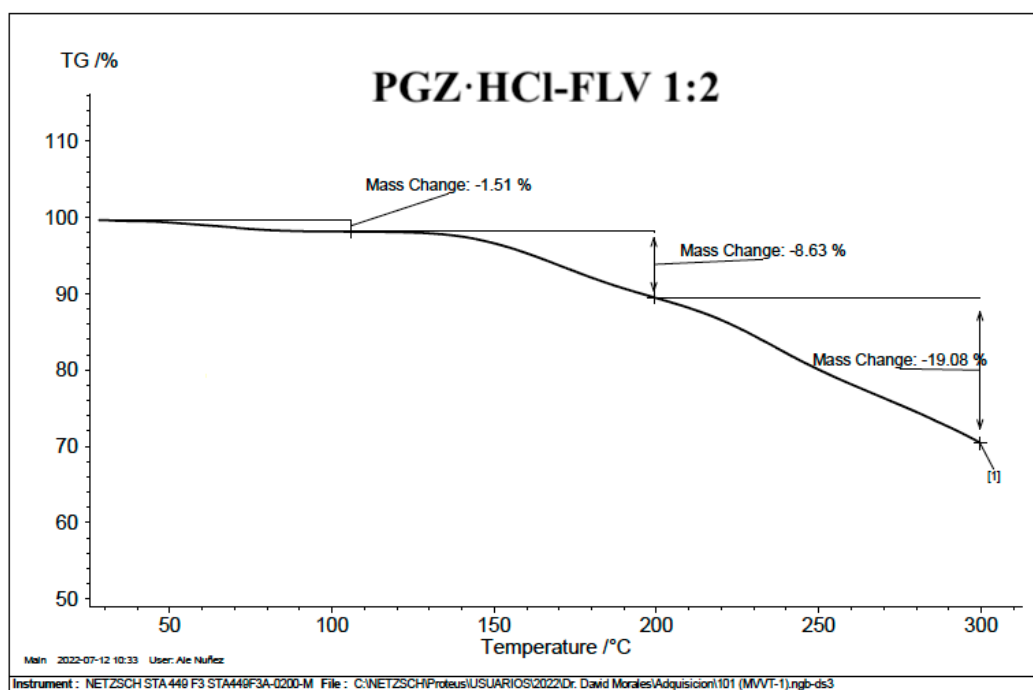

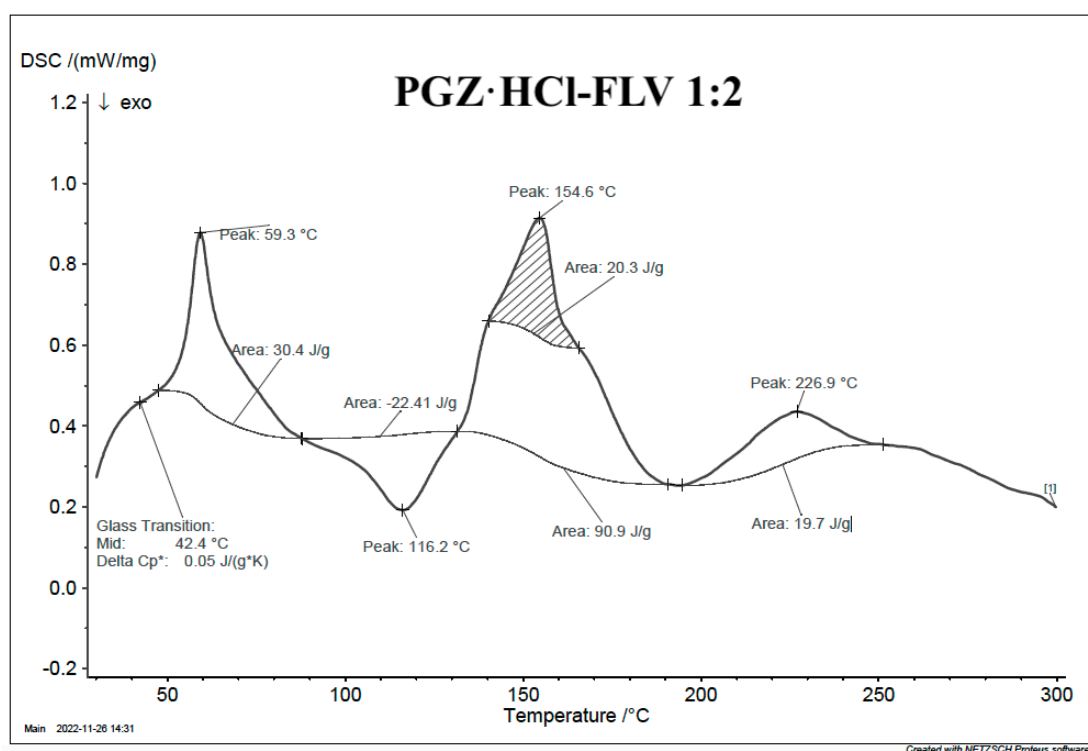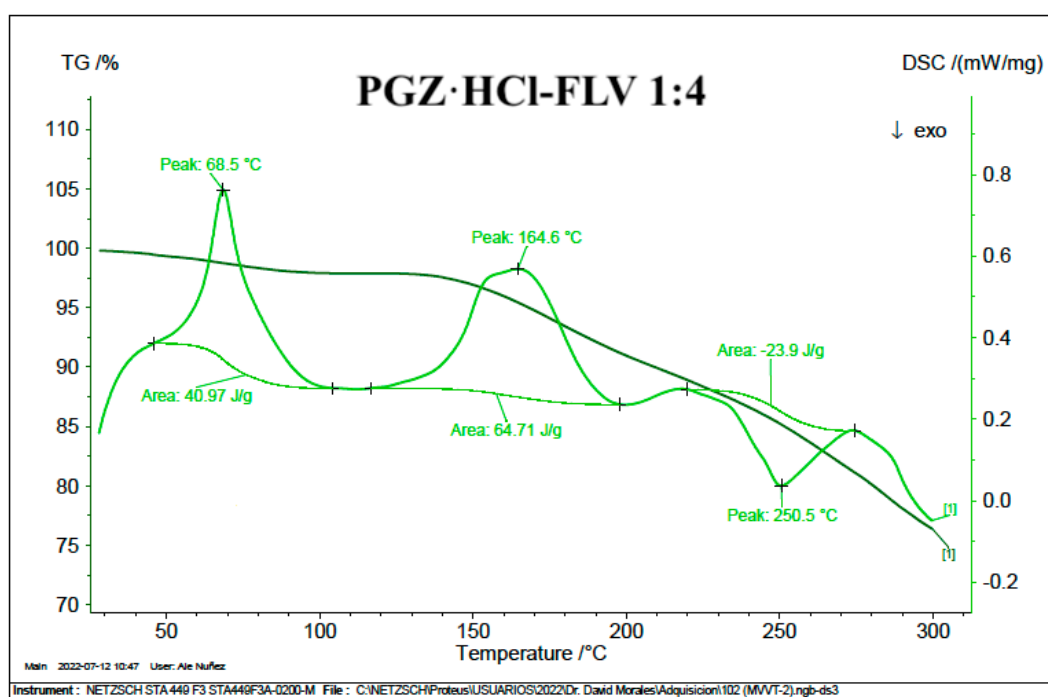

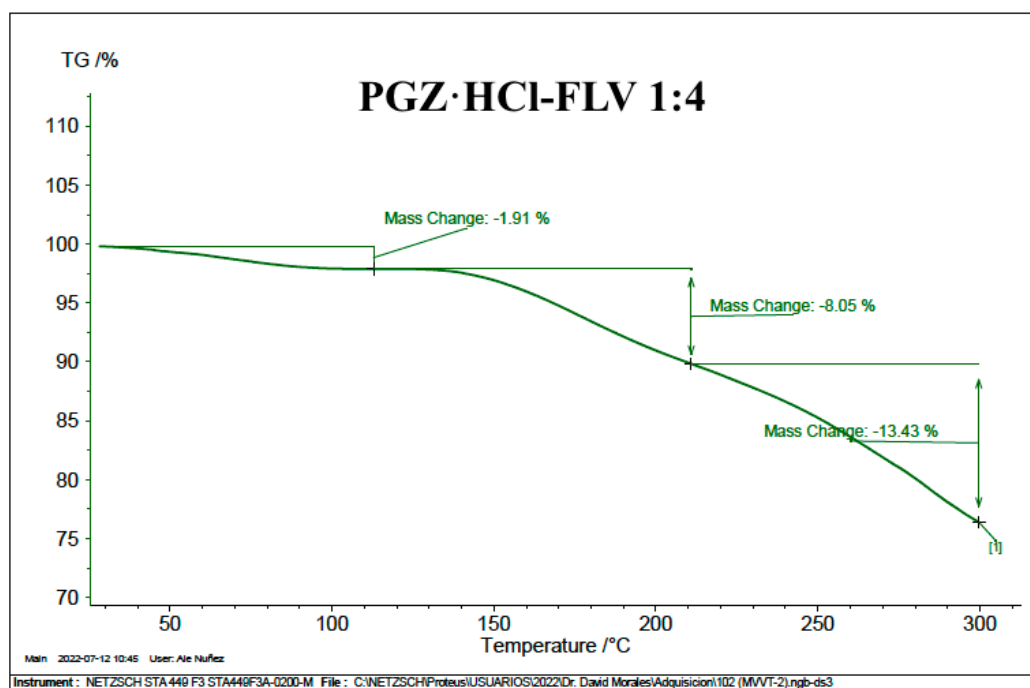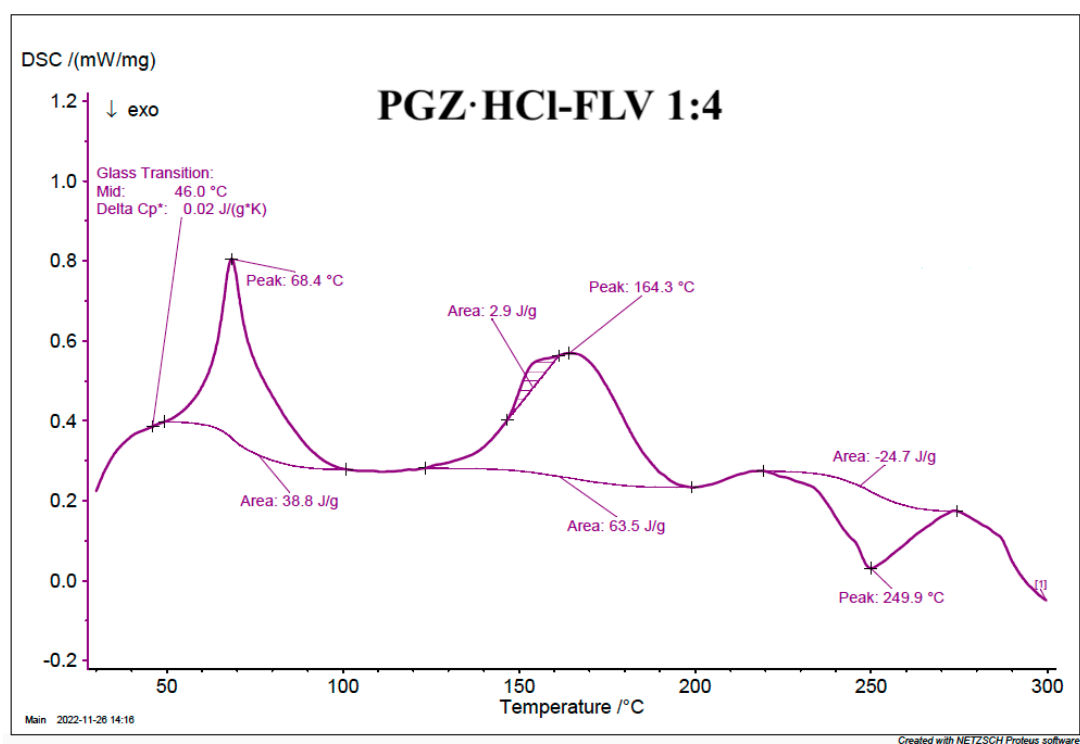

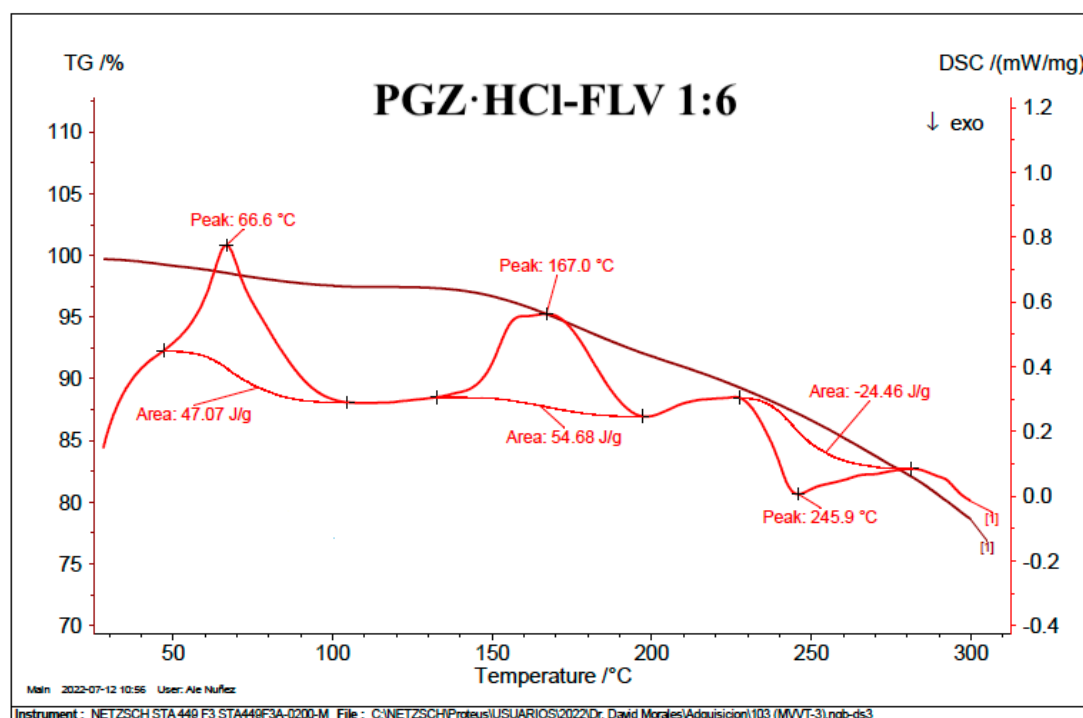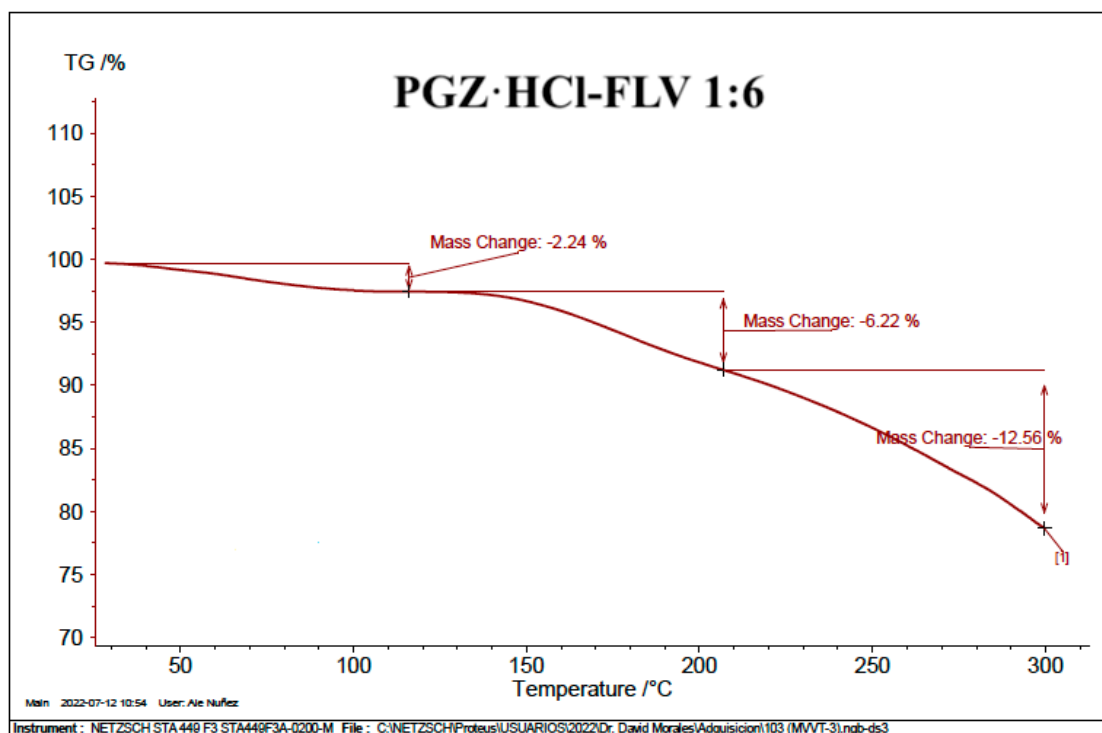

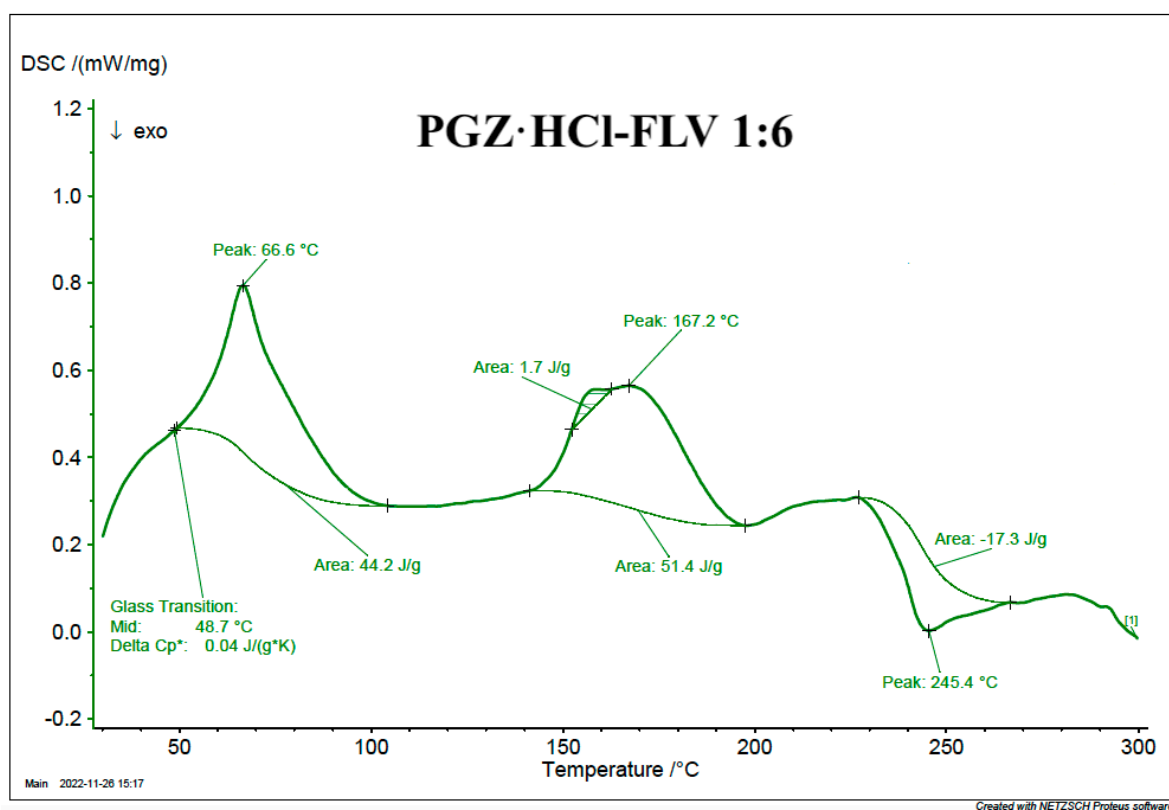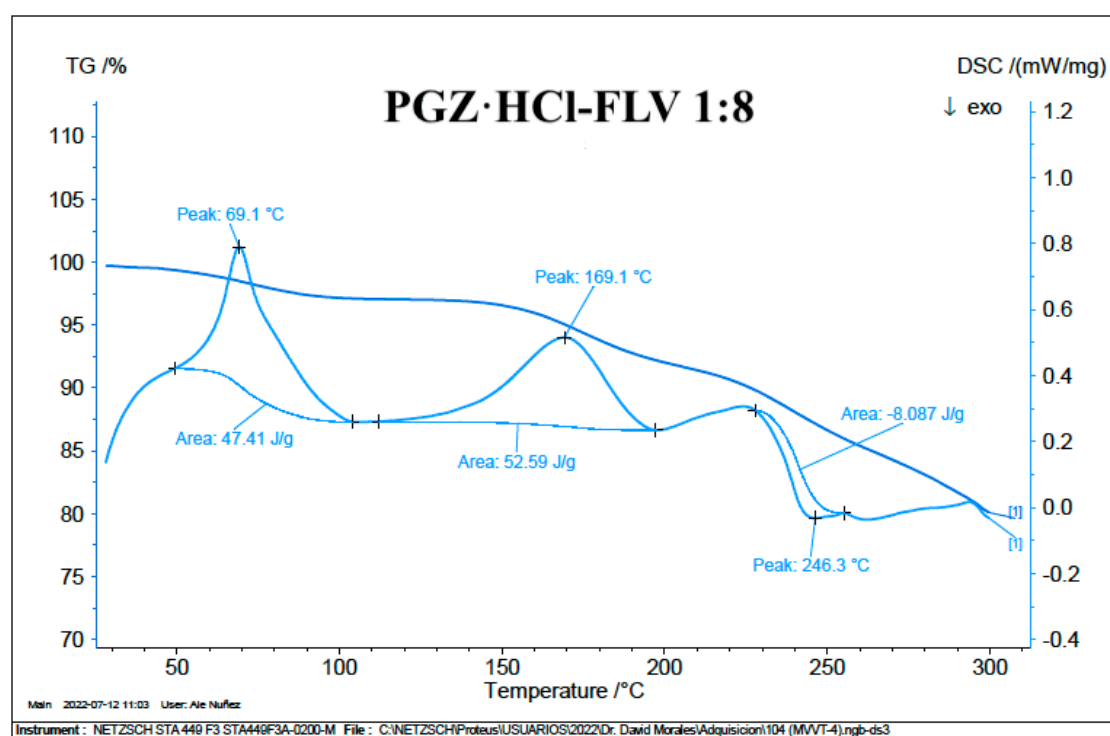

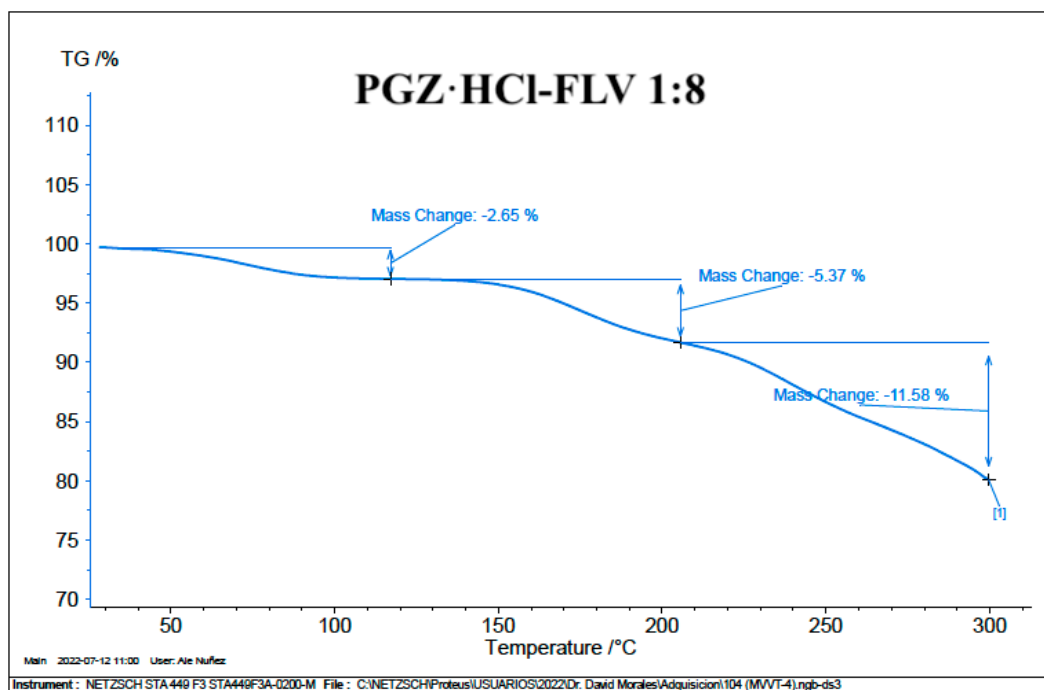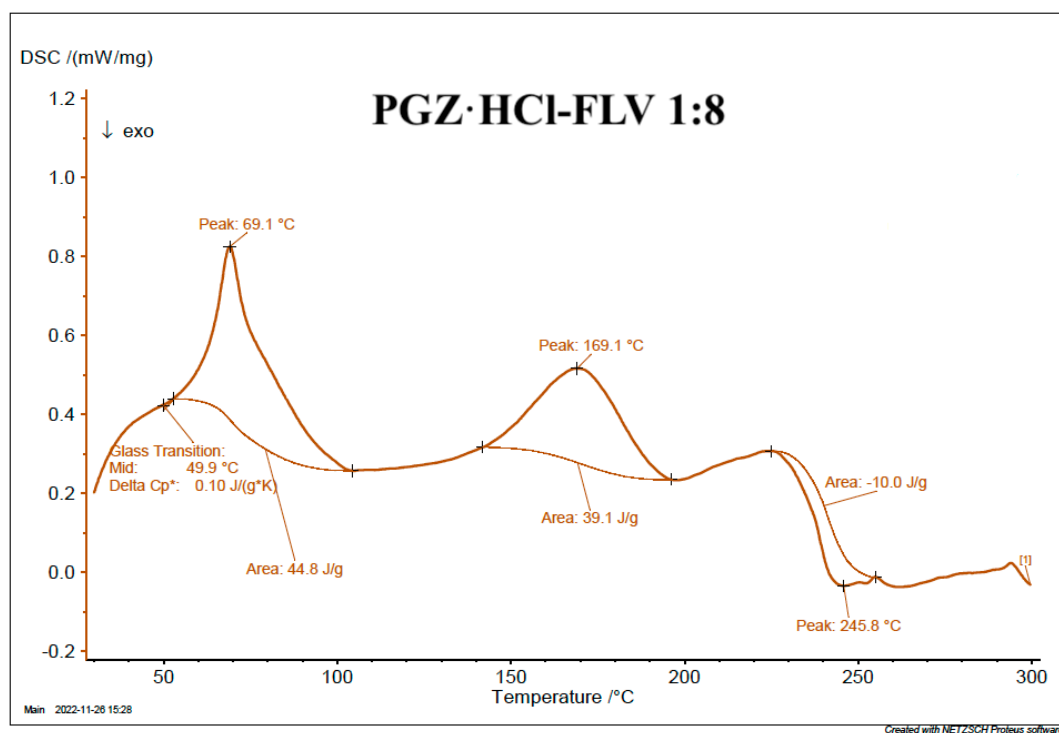

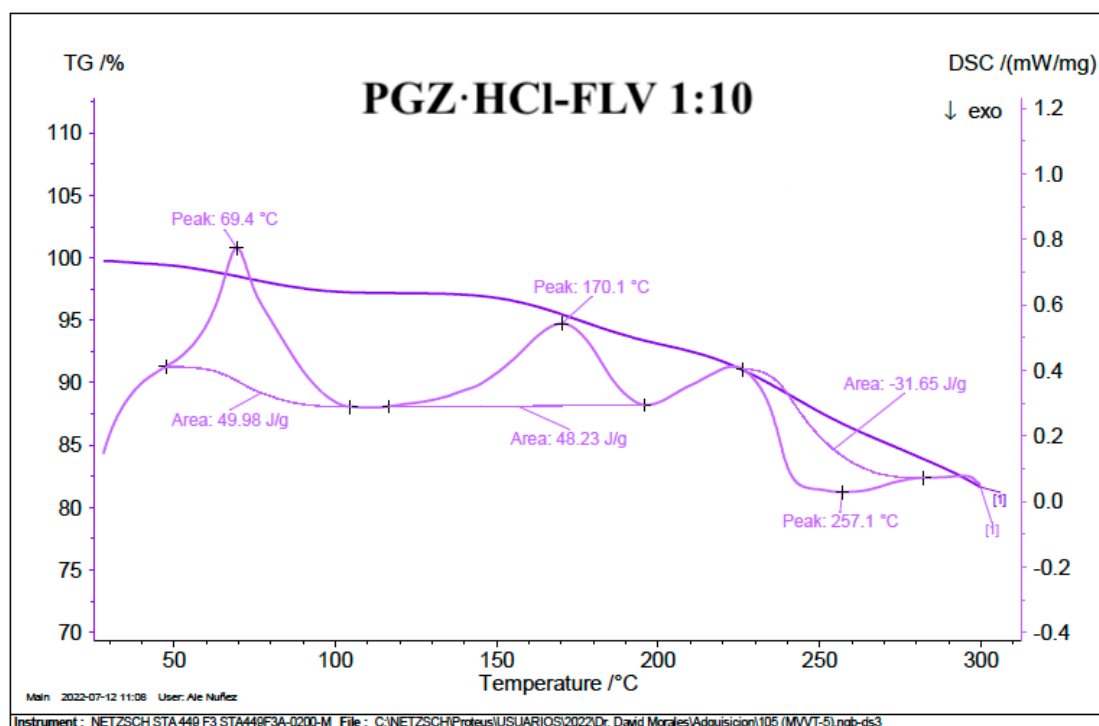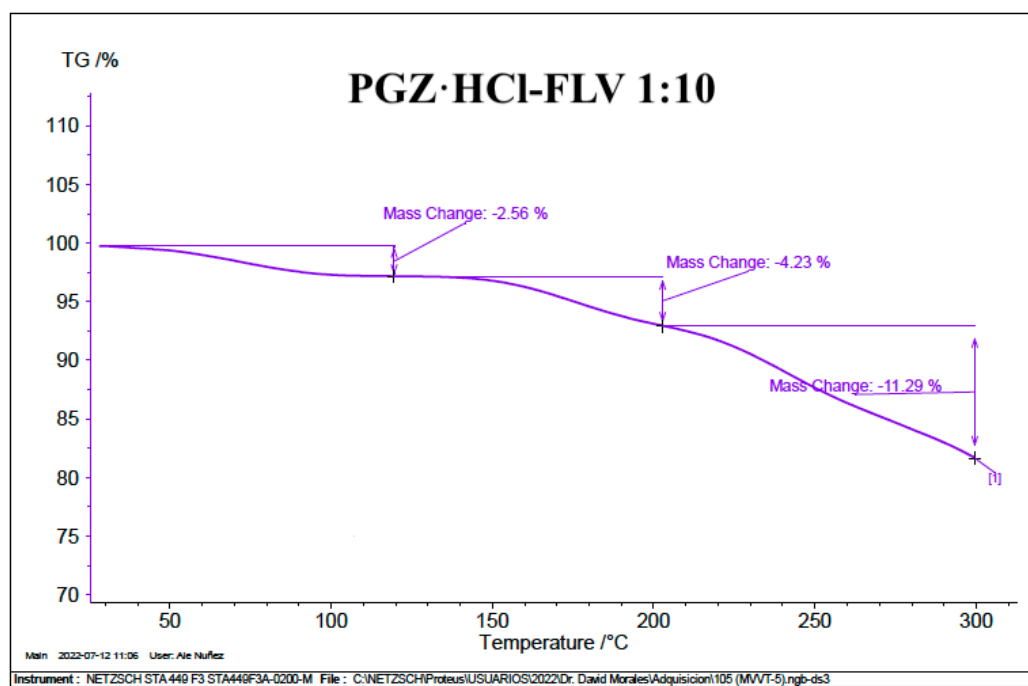

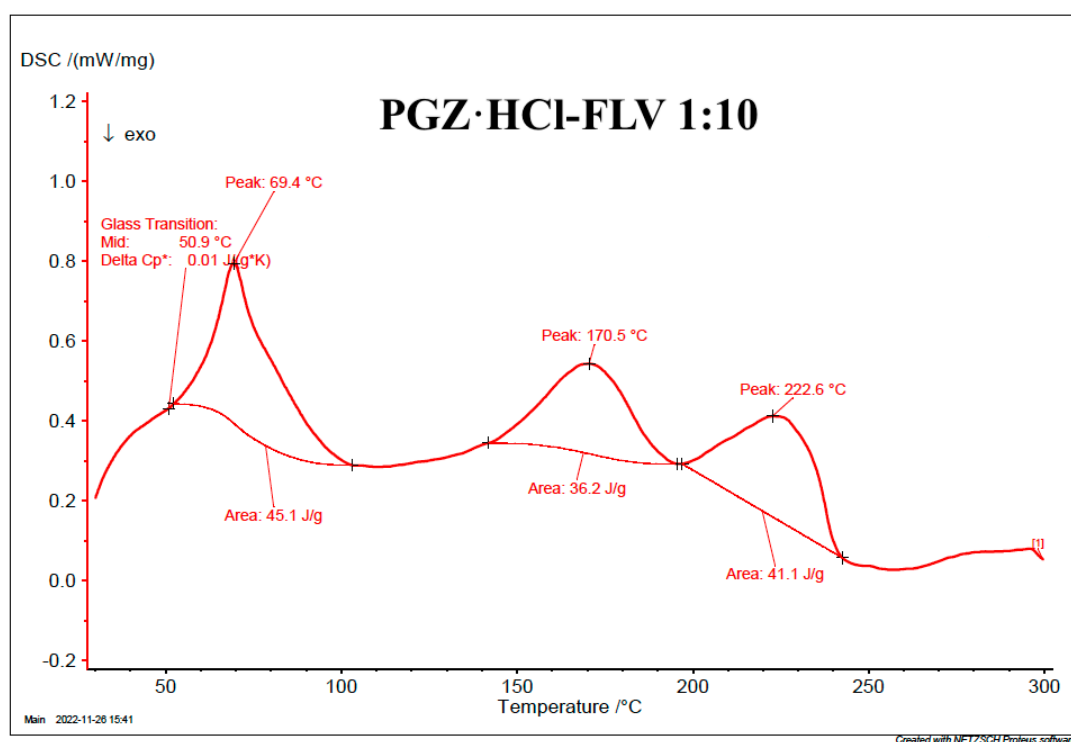

**Figure SM7.** Individual DSC-TGA thermograms of the solid forms of PGZ·HCl-FLV at different stoichiometric ratios (1:2; 1:4; 1:6; 1:8 and 1:10)

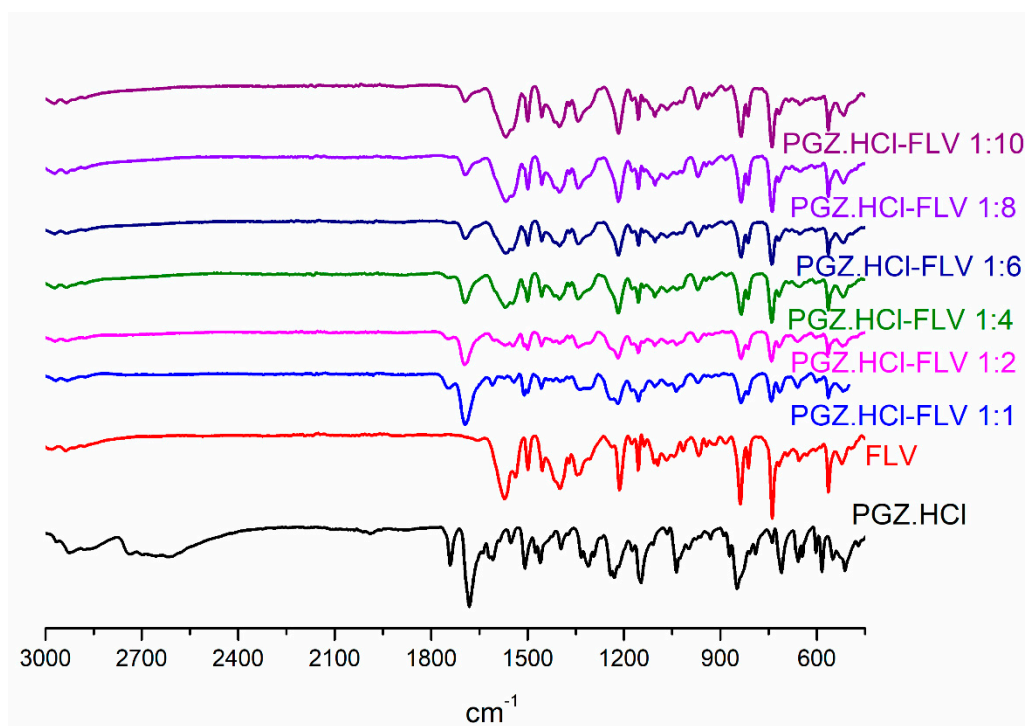

**Figure SM8.** Full FT-IR spectra of the solid forms of PGZ·HCl-FLV at different stoichiometric ratios (1:1; 1:2; 1:4; 1:6; 1:8 and 1:10)

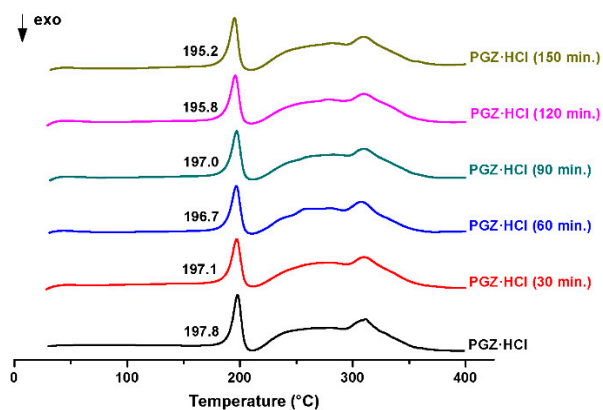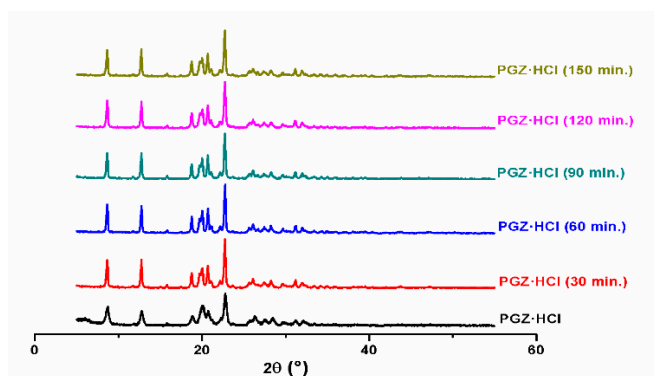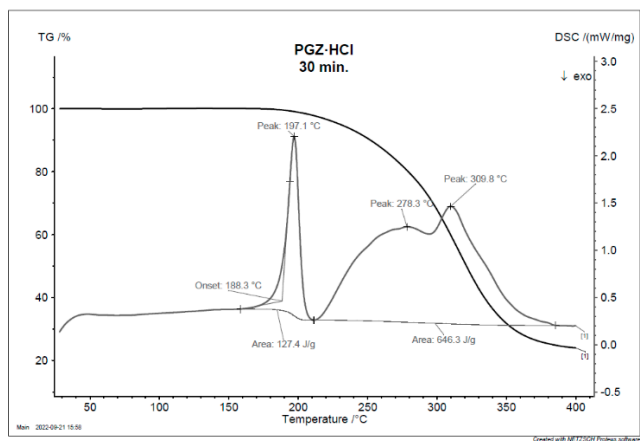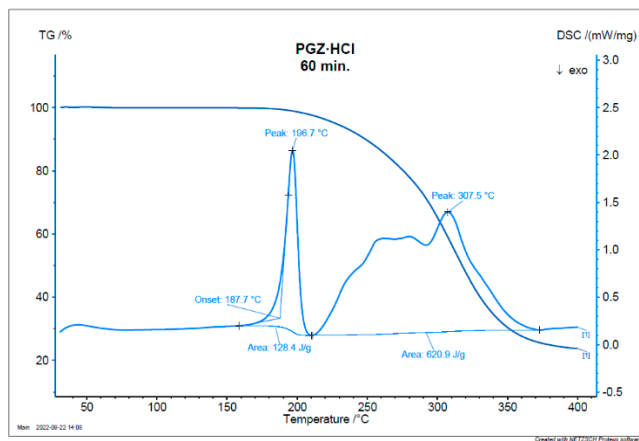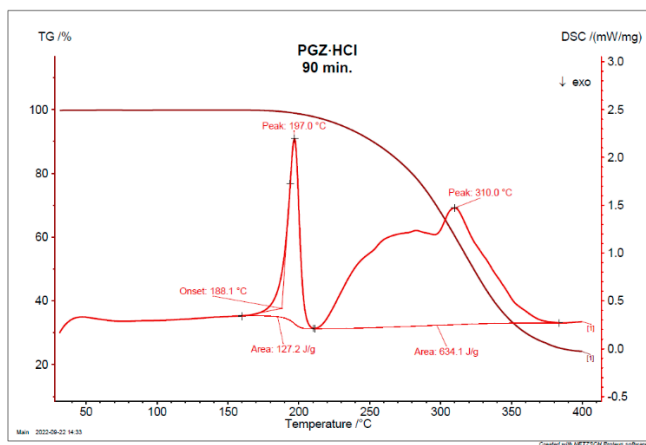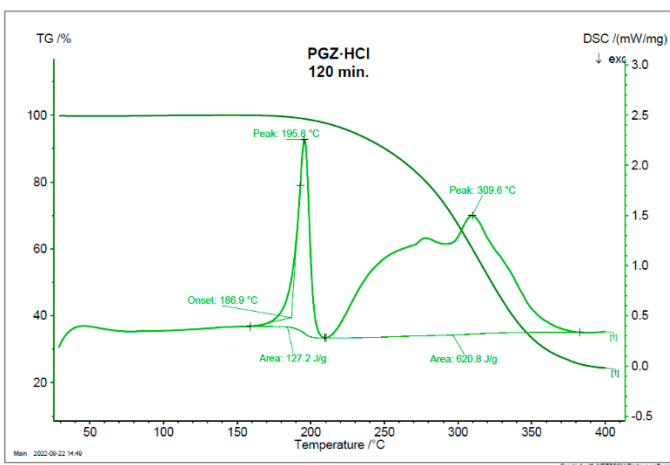

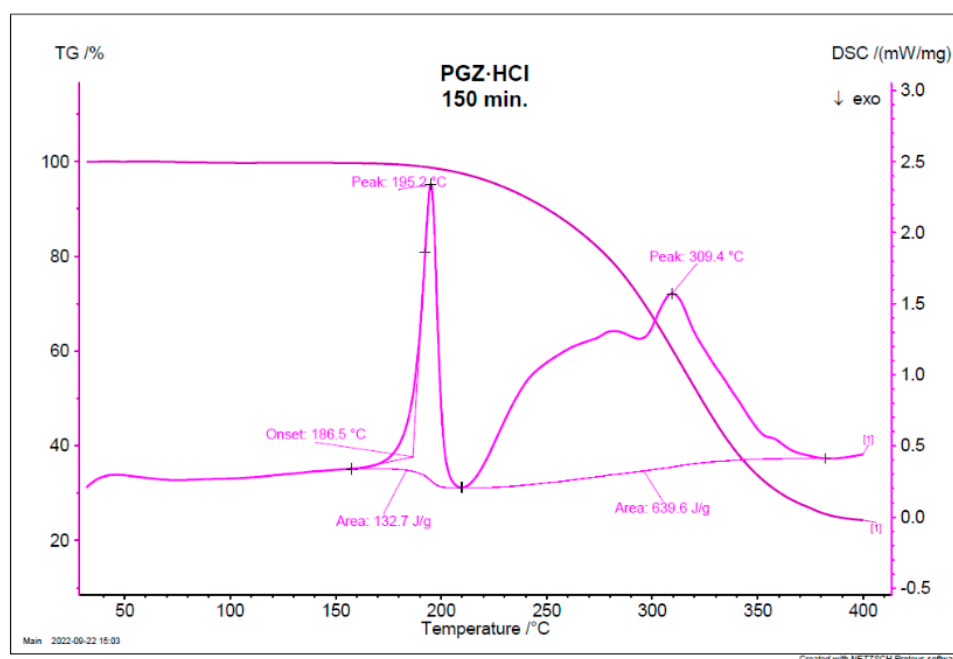

Figure SM9. Evaluation of the amorphization ability of the PGZ·HCl

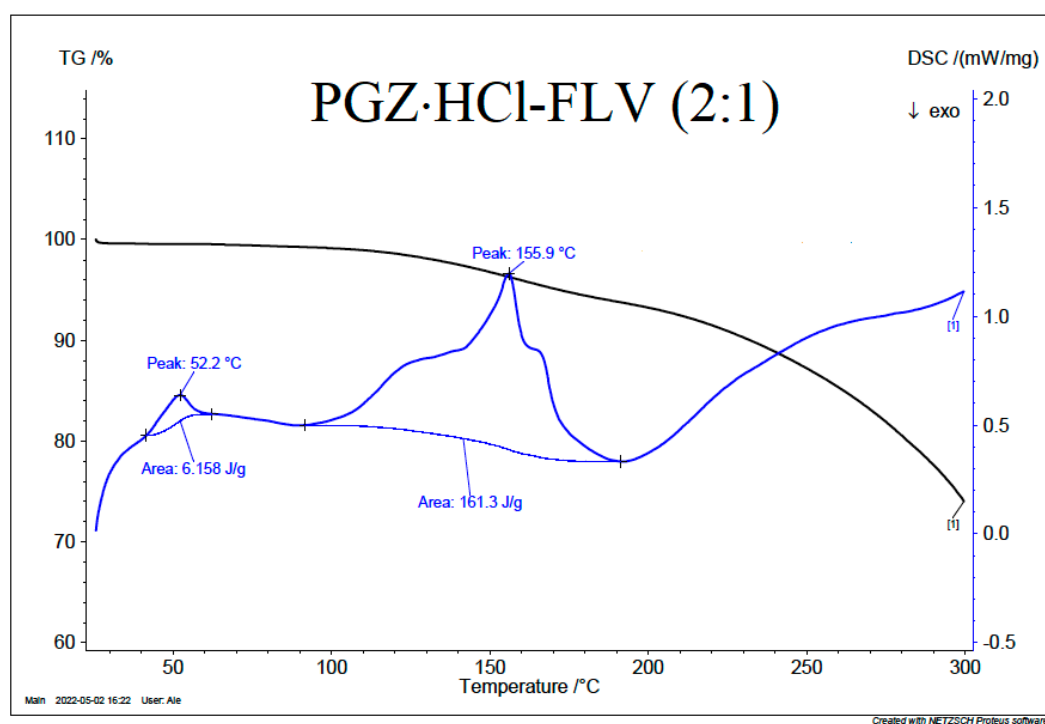

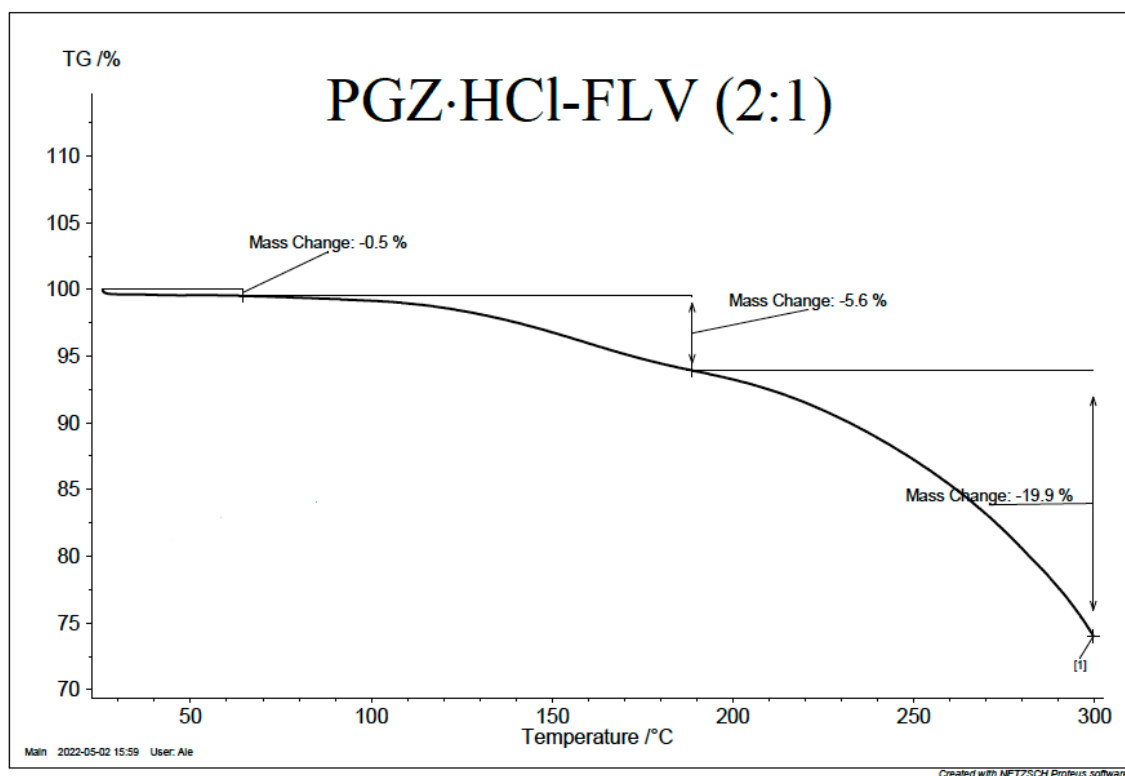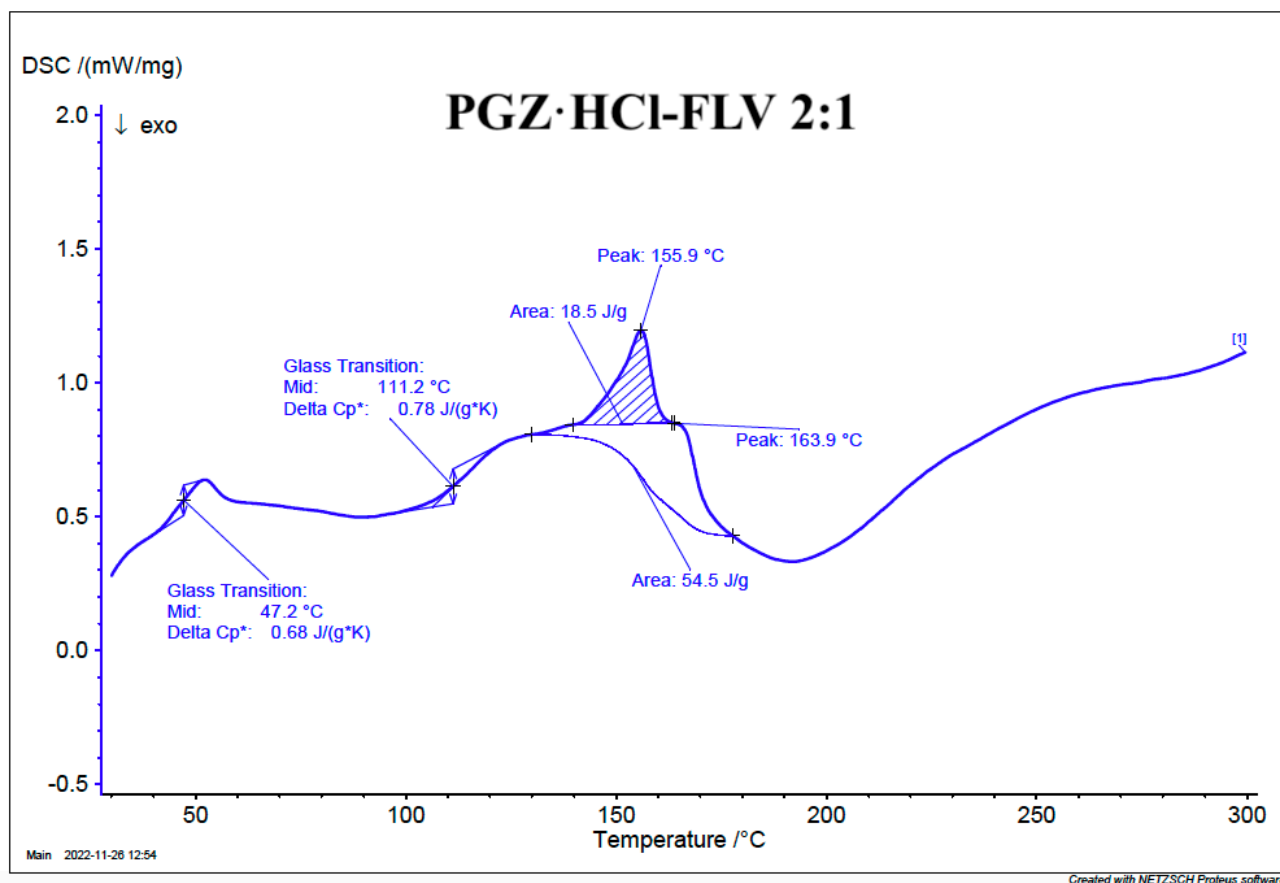

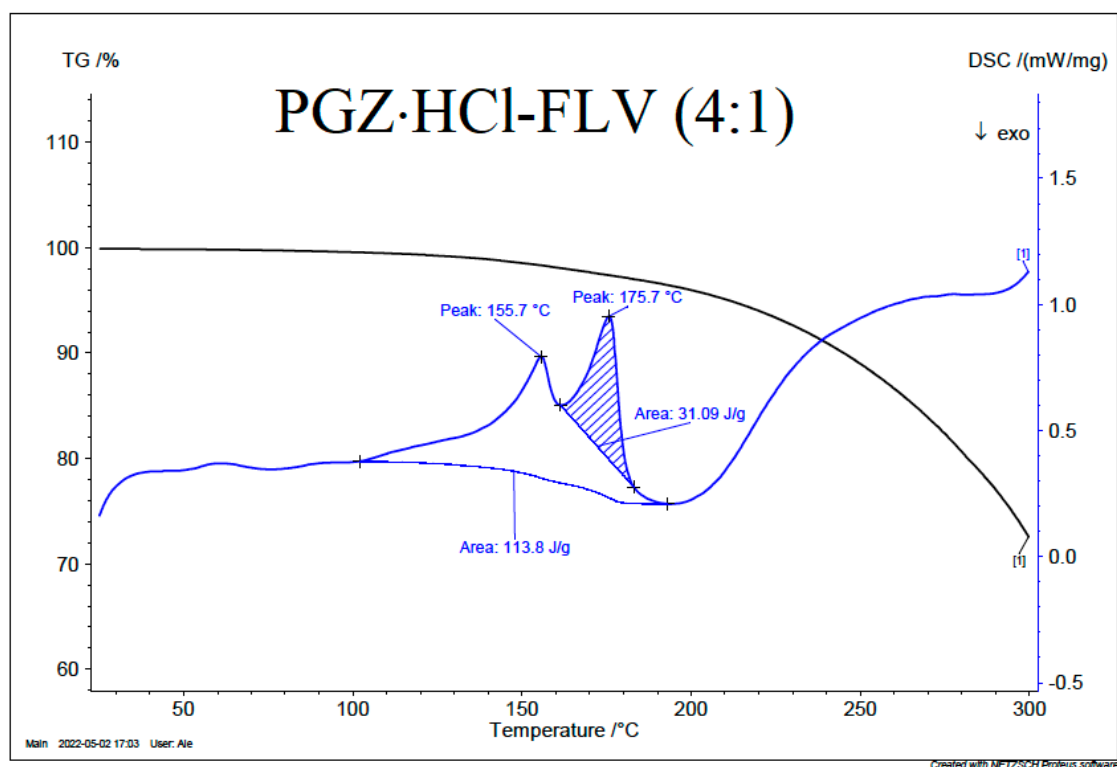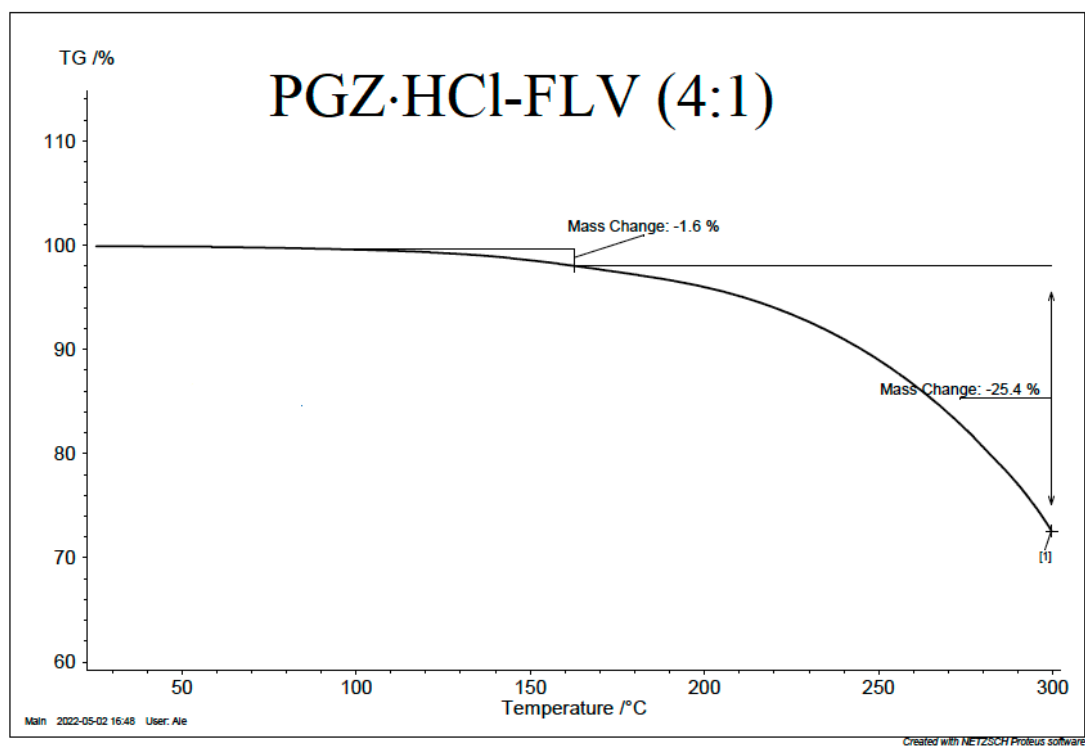

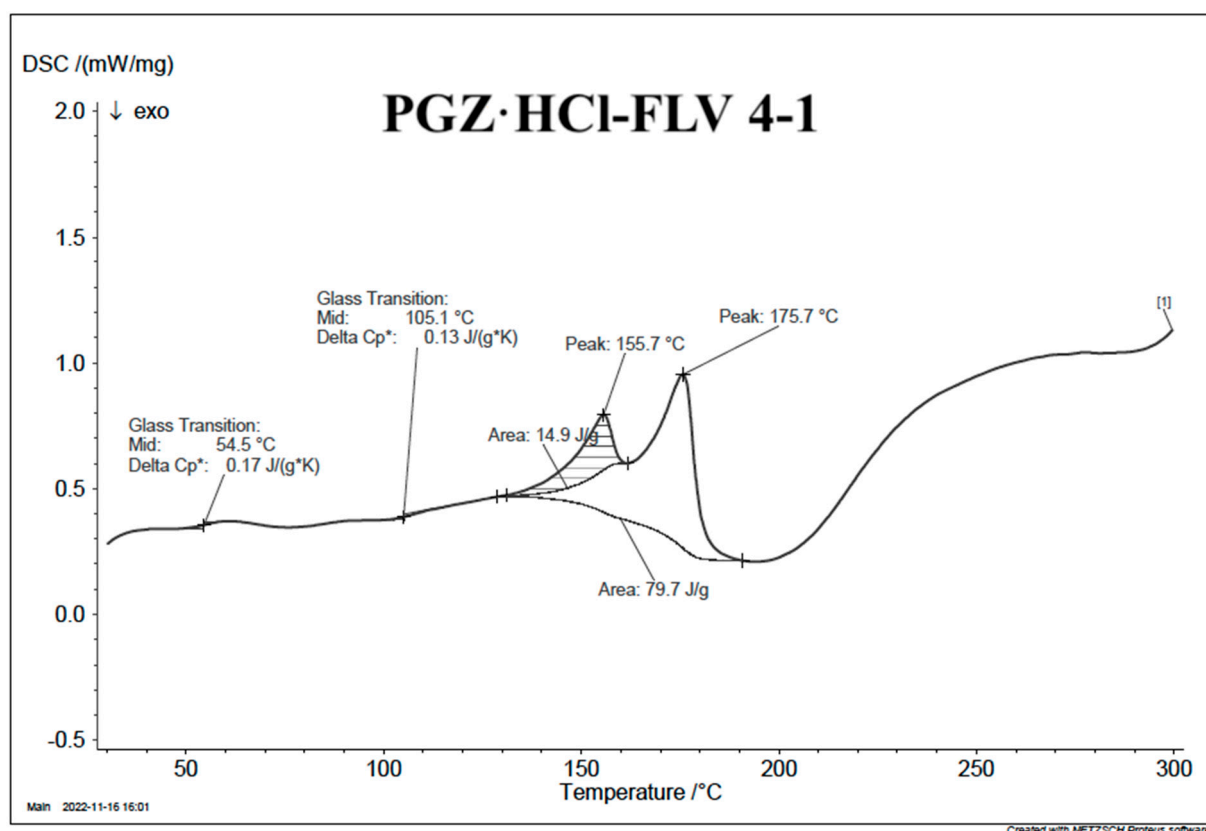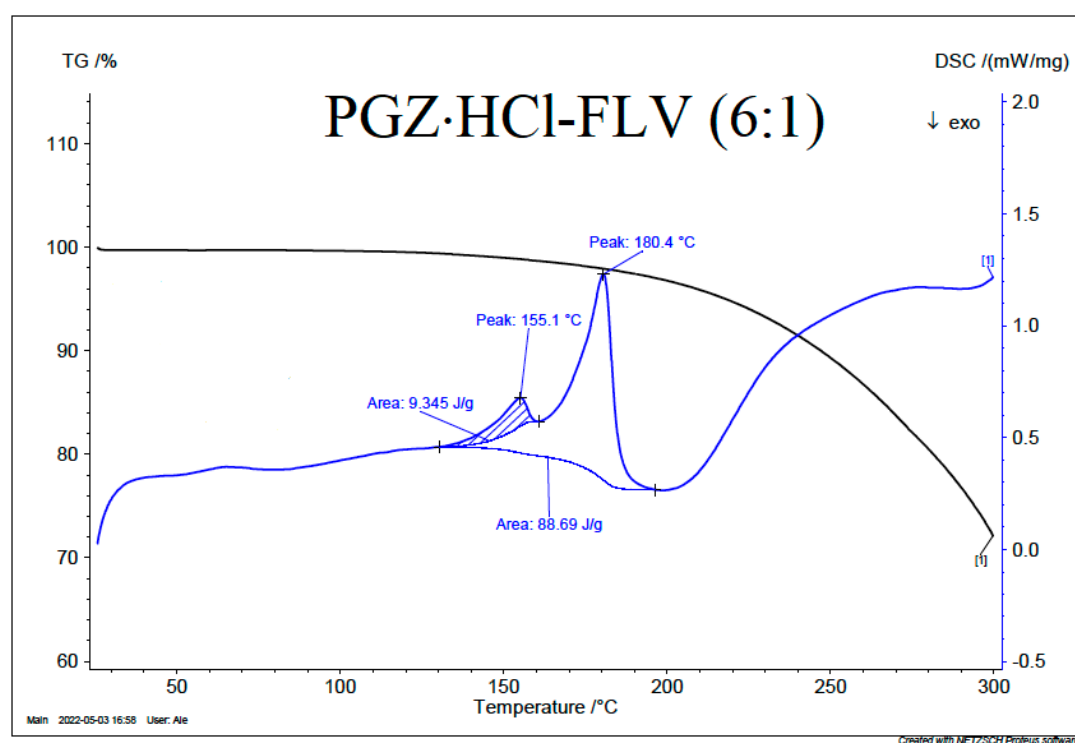

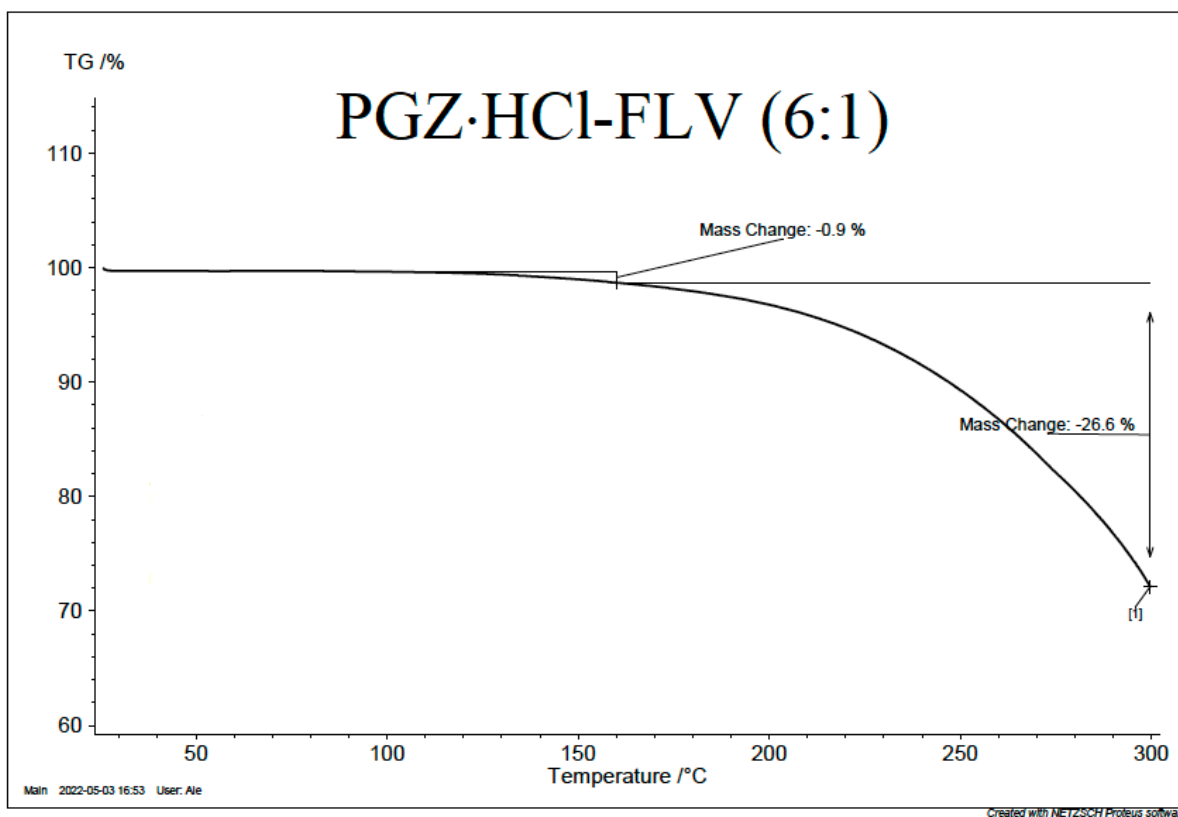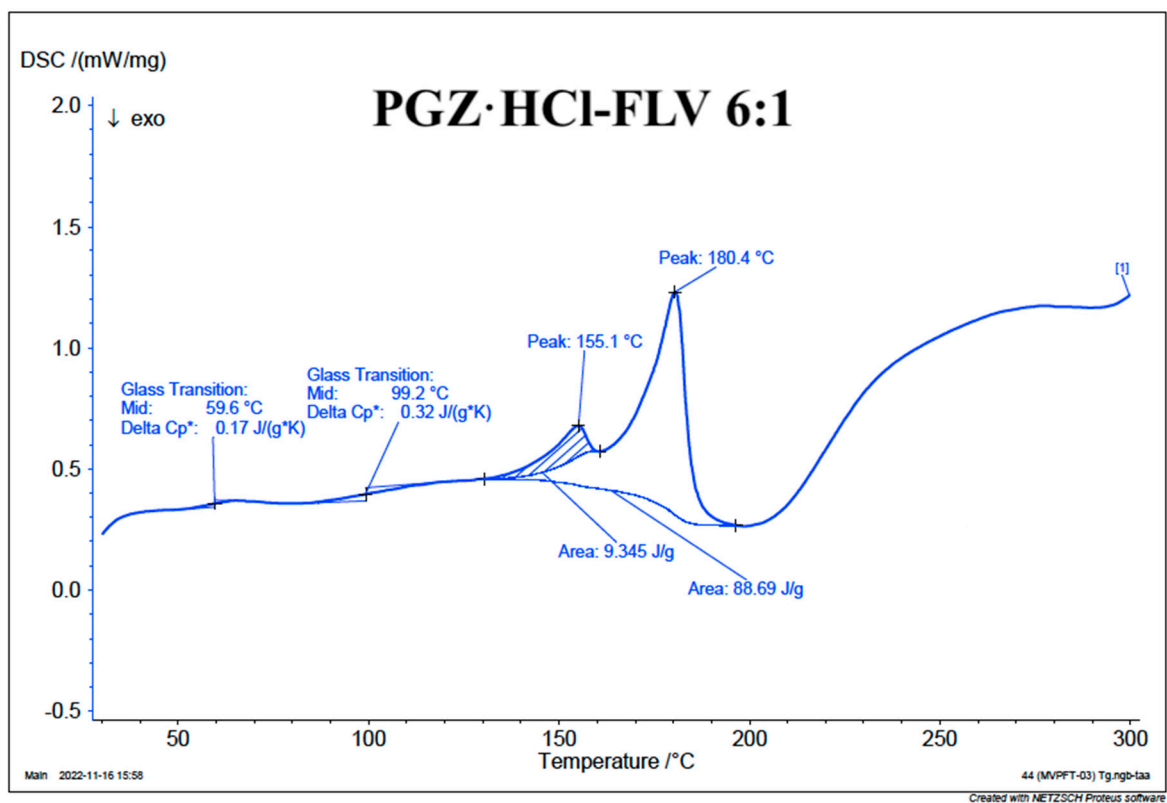

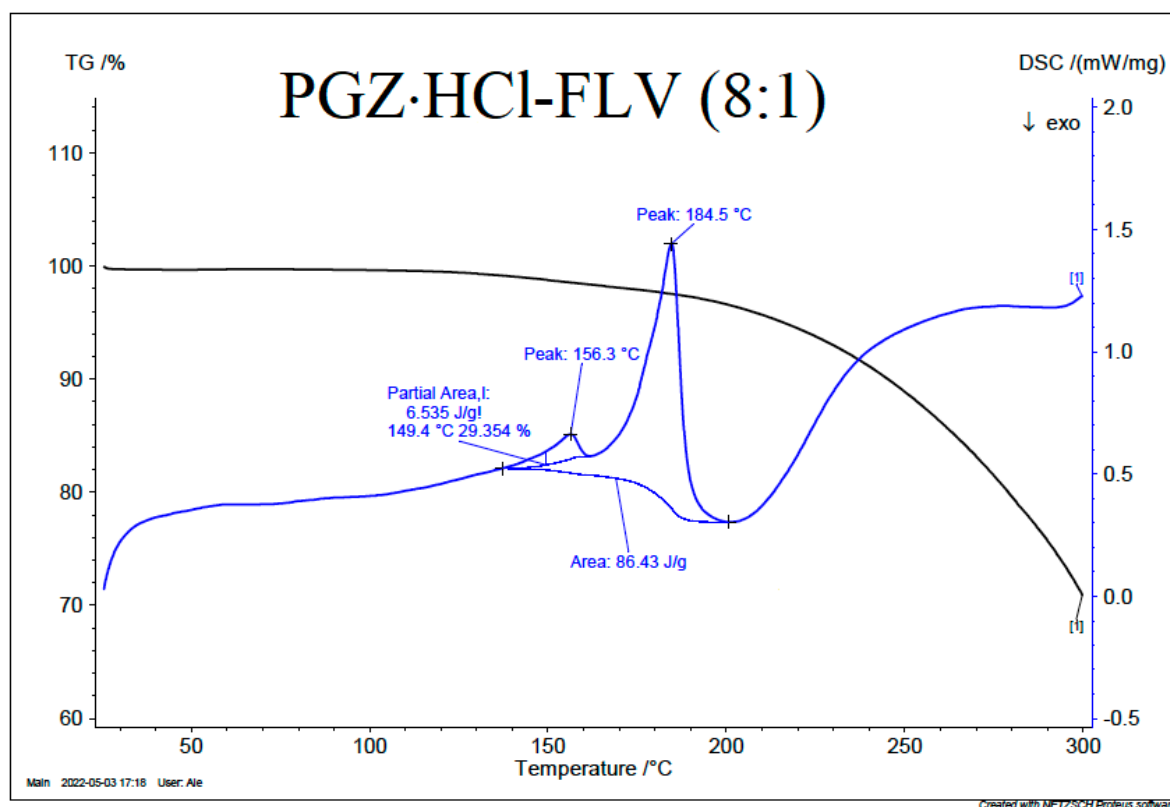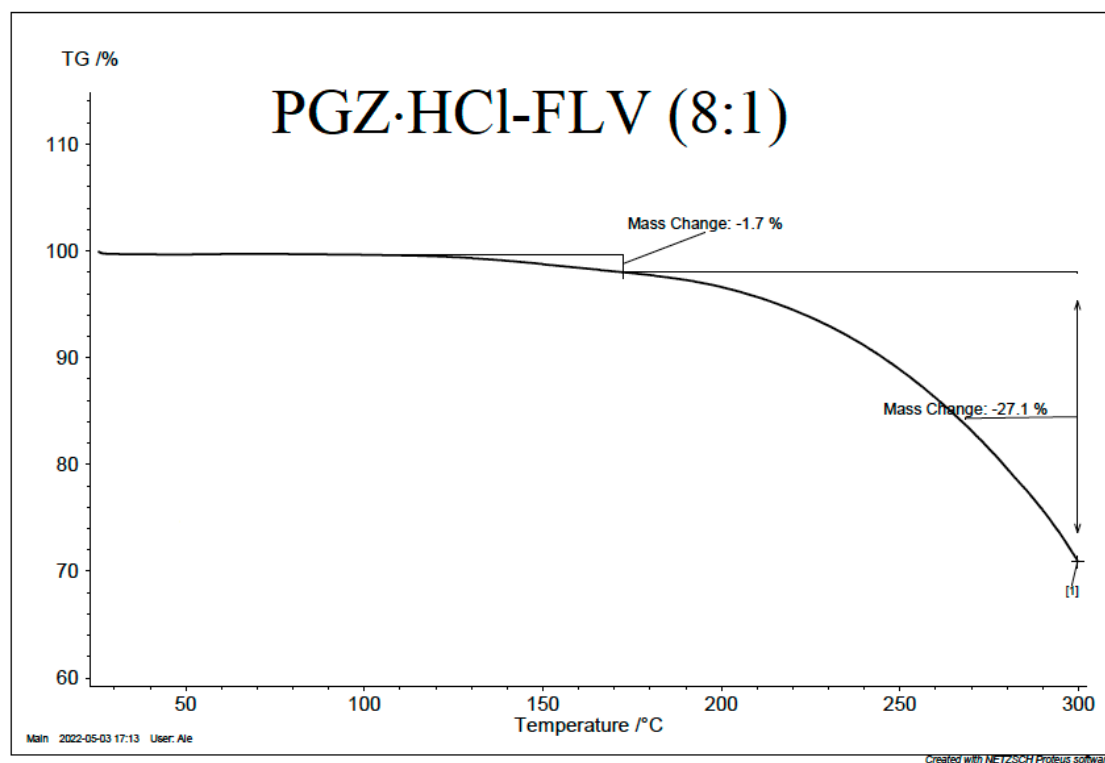

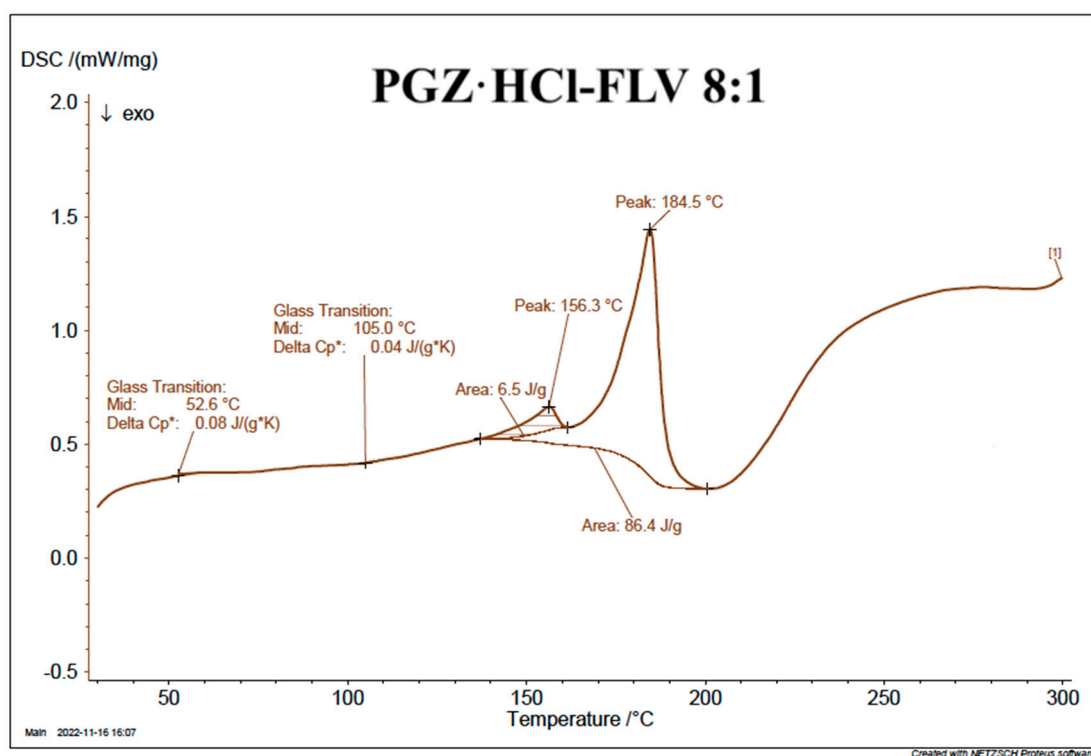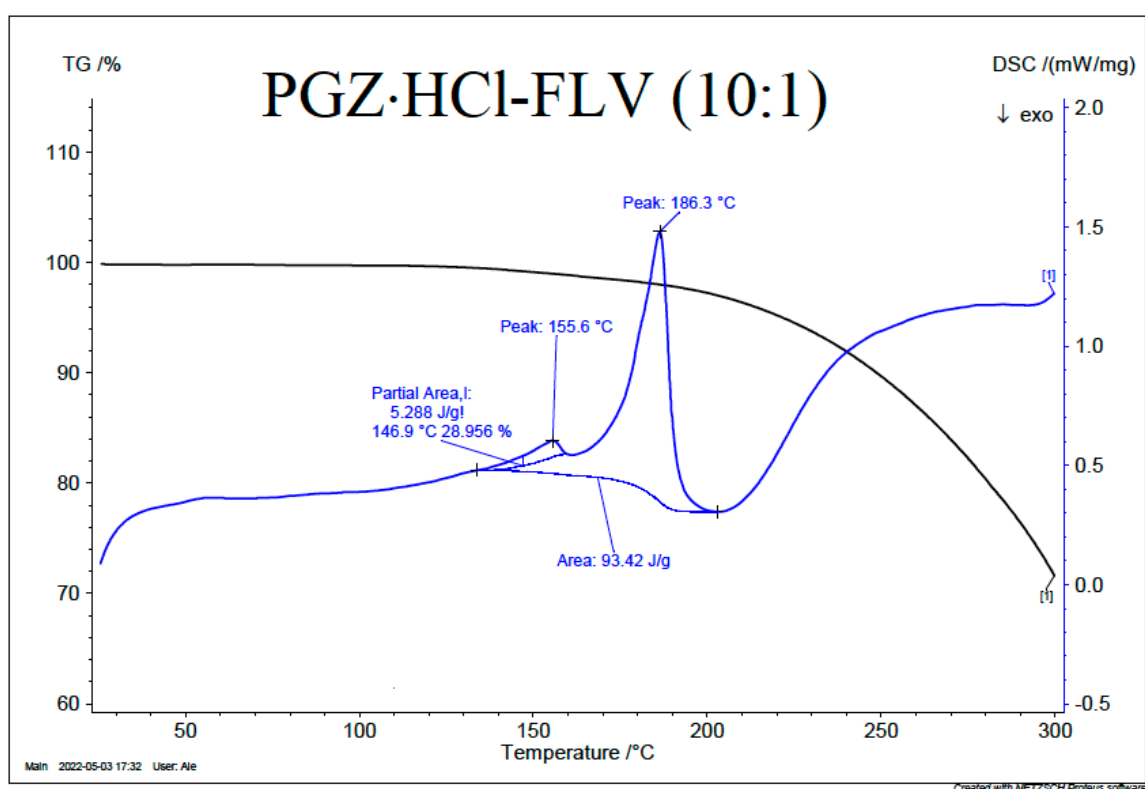

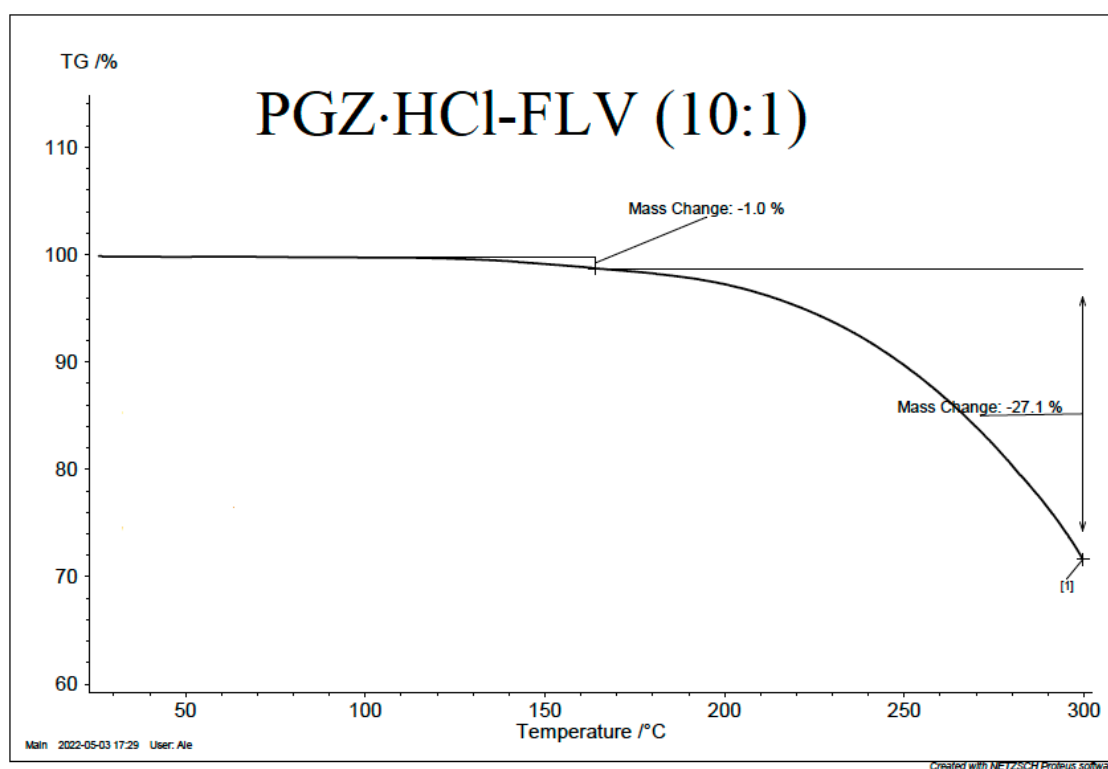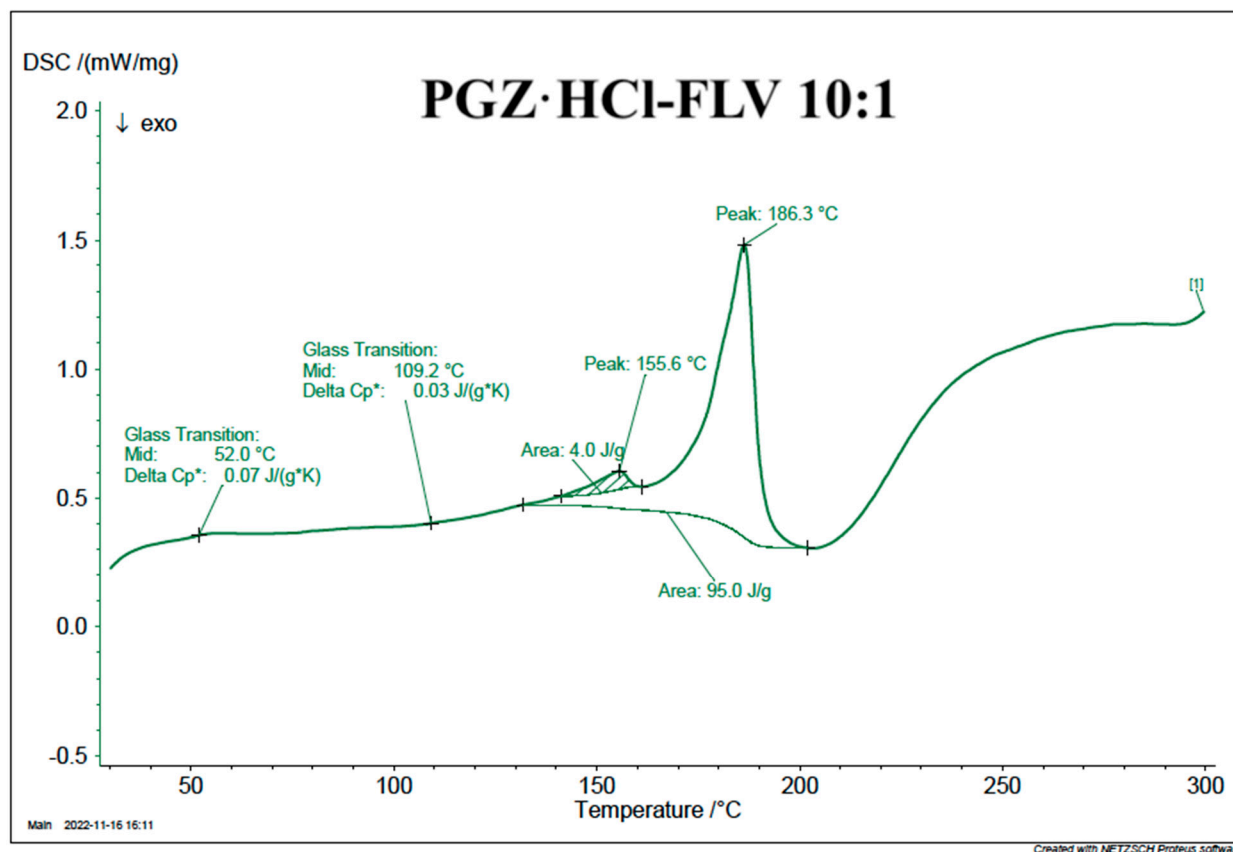

**Figure SM10.** Individual DSC-TGA thermograms of the solid forms of PGZ·HCl-FLV at different stoichiometric ratios (2:1; 4:1; 6:1; 8:1 and 10:1)

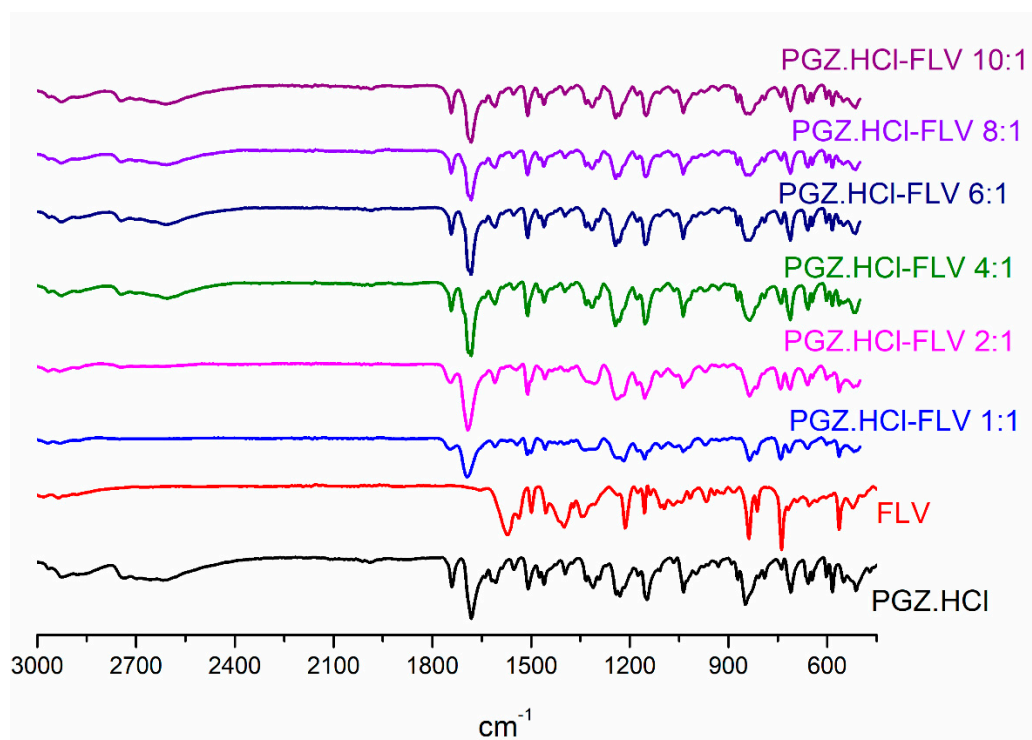

**Figure SM11.** Full FT-IR spectra of the solid forms of PGZ·HCl-FLV at different stoichiometric ratios (2:1; 4:1; 6:1; 8:1 and 10:1)

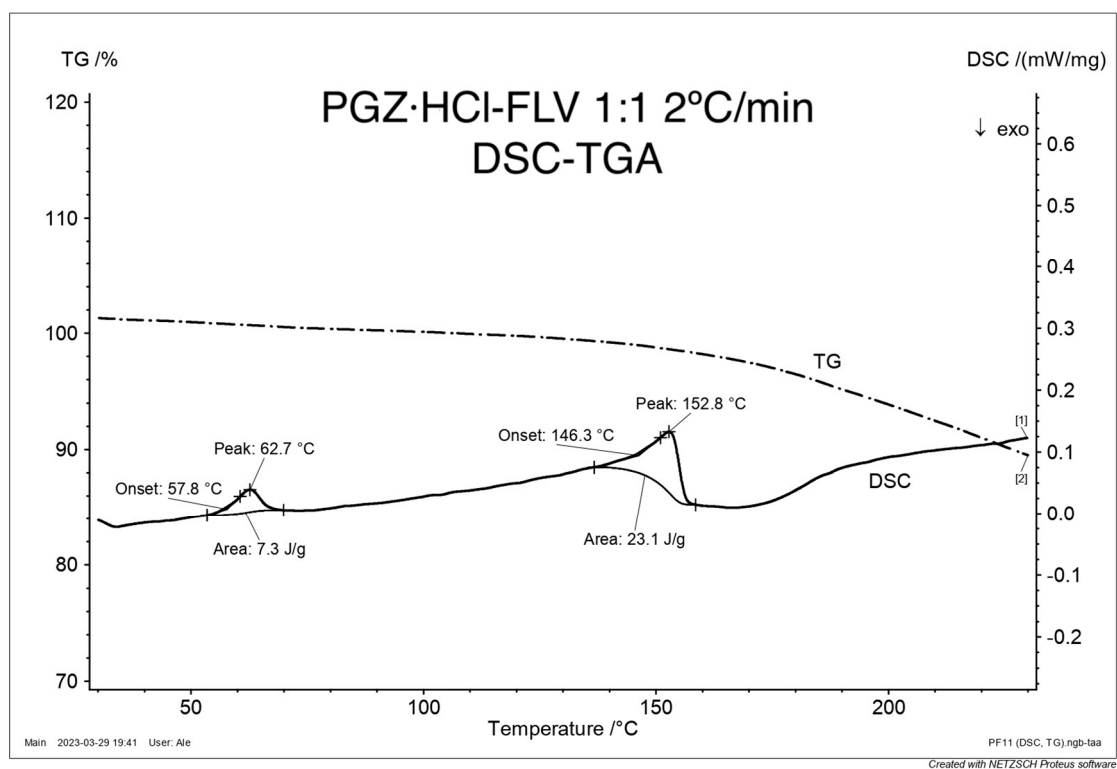

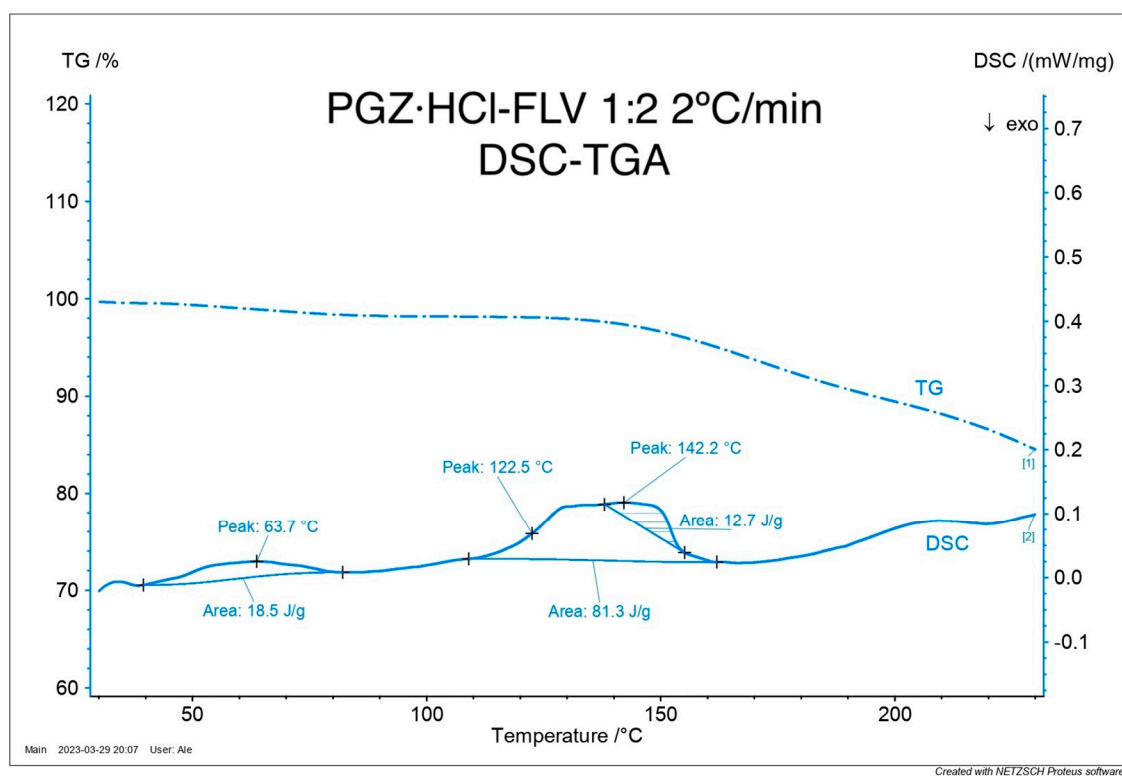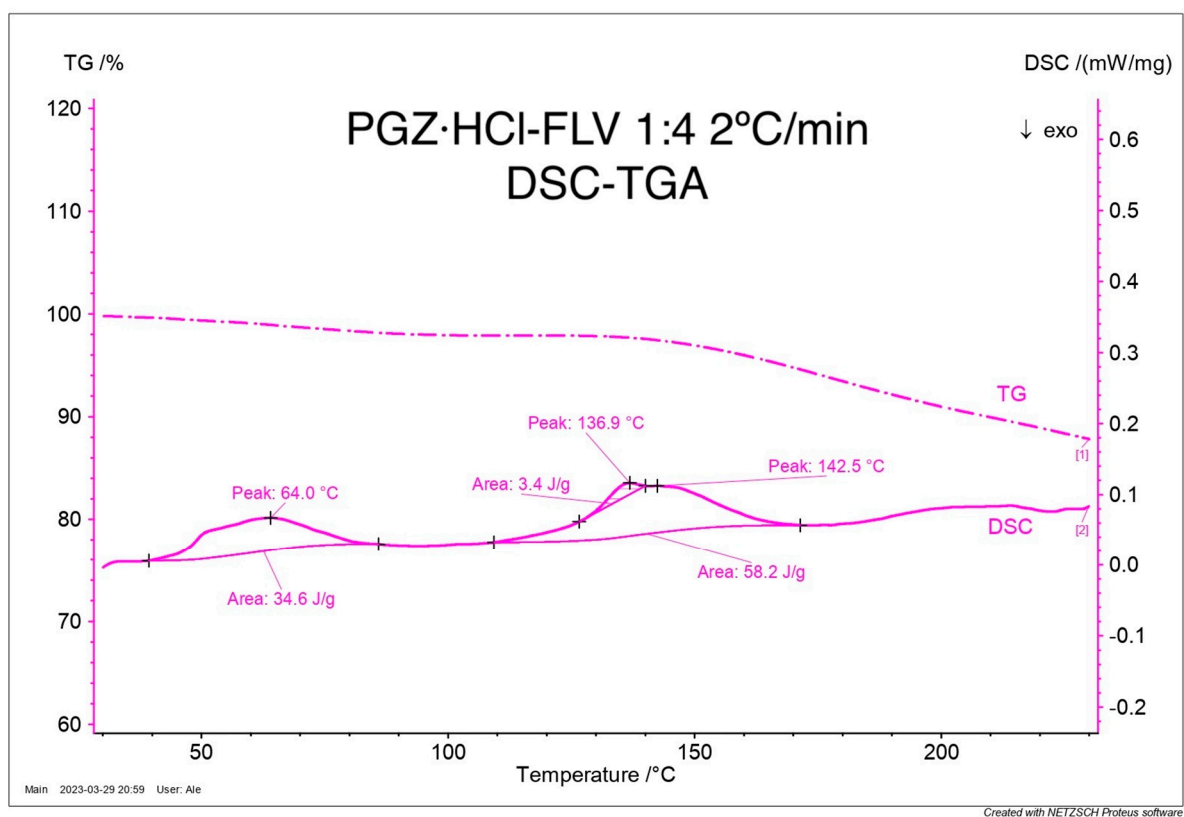

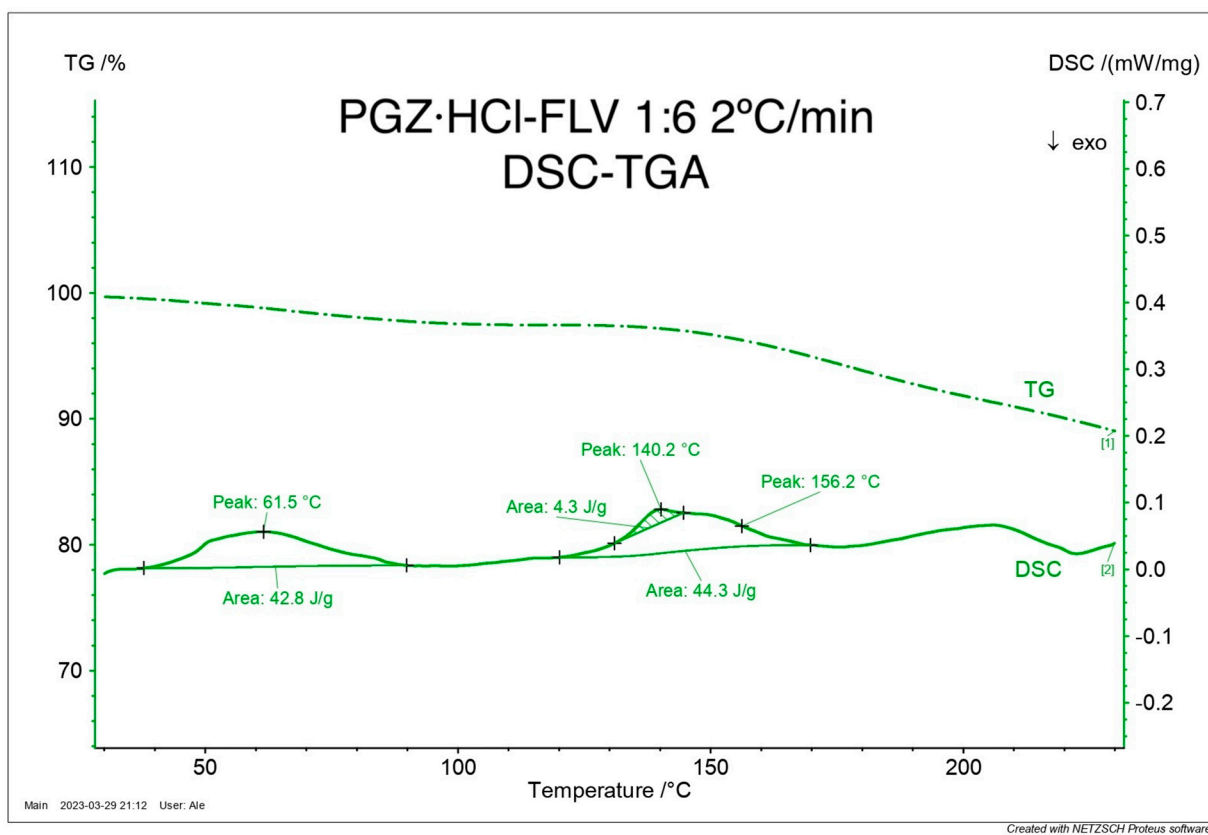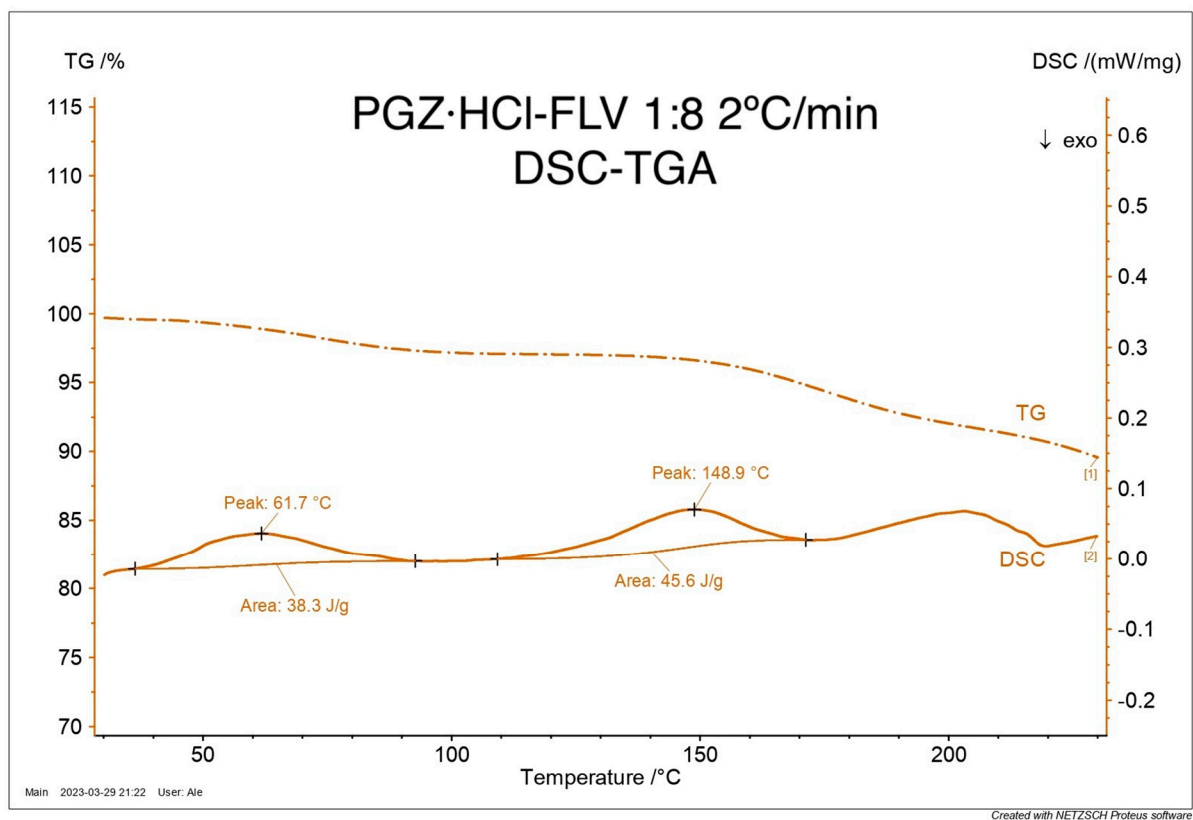

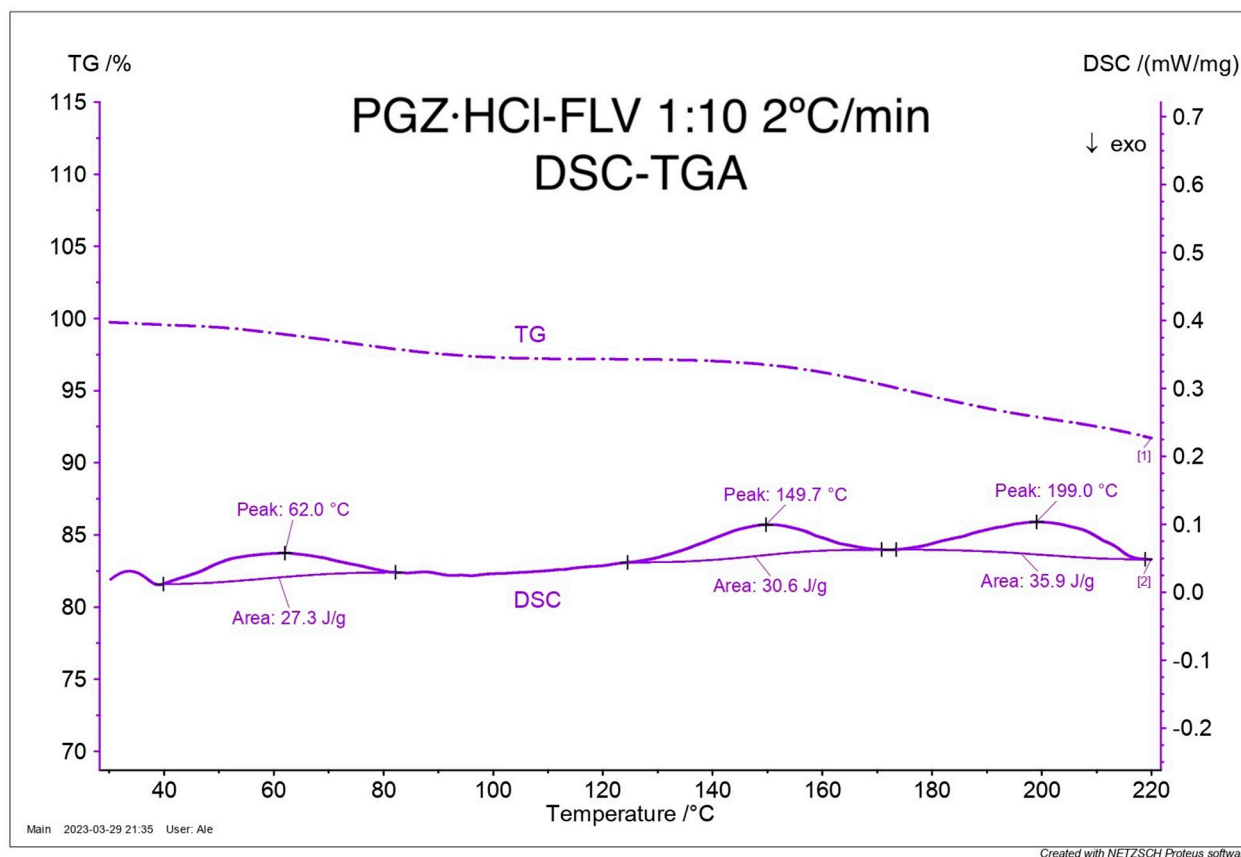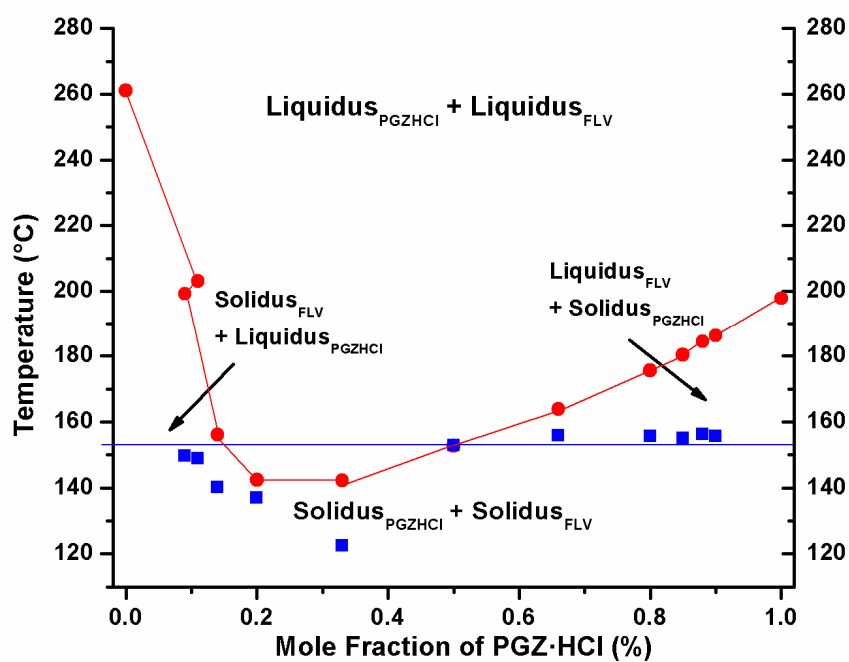

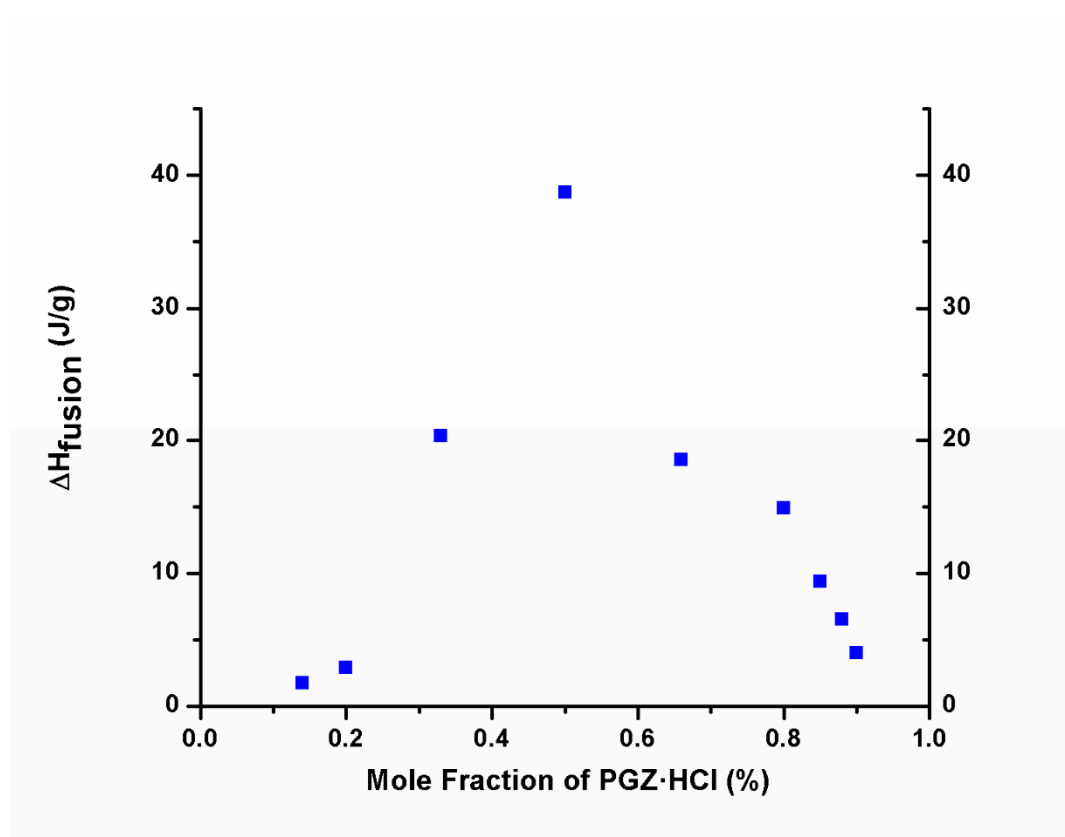

**Figure SM12.** PGZ-HCl-FLV binary phase diagram and Tammann's plot triangle. Thermograms corresponding to the molar ratios 1:1; 1:2; 1:4; 1:6; 1: and 1:10 at 2 °C/min.

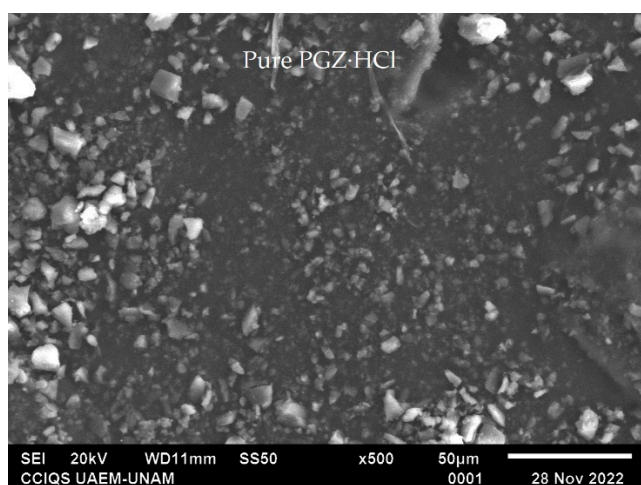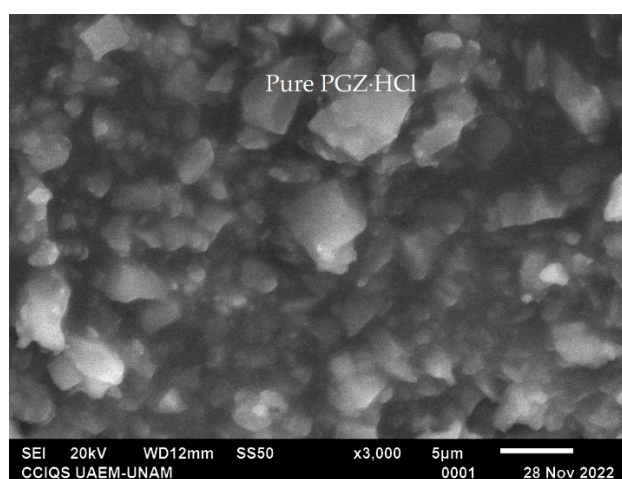

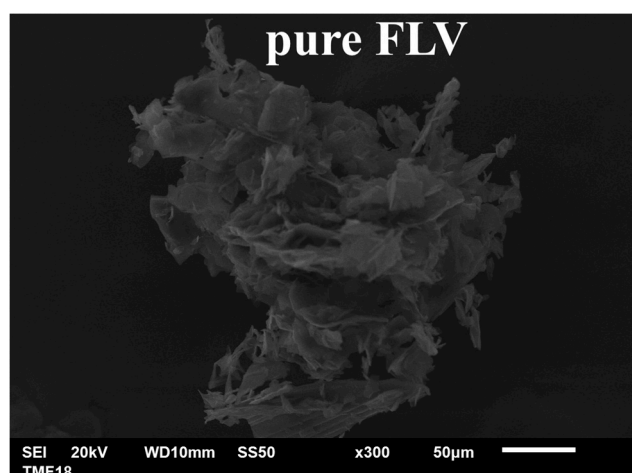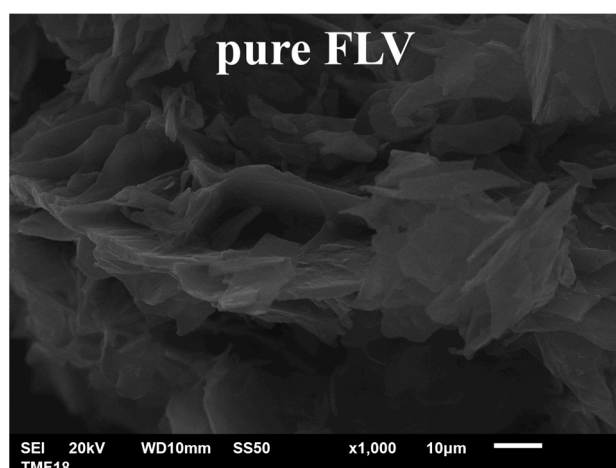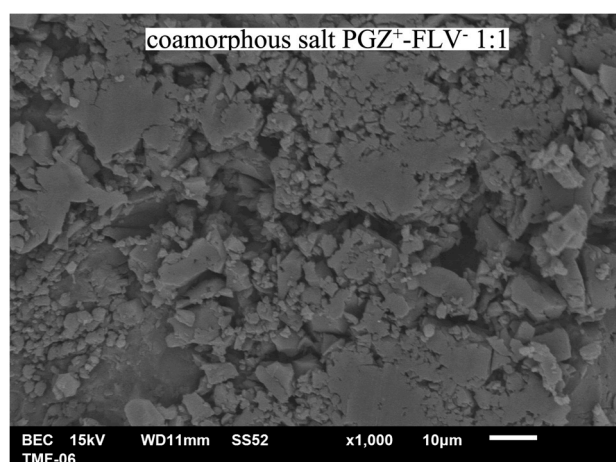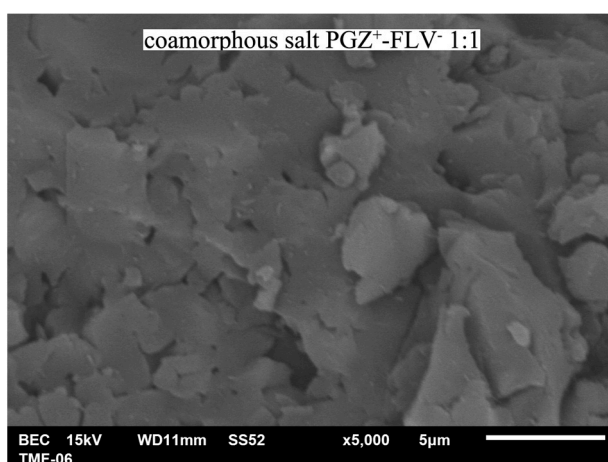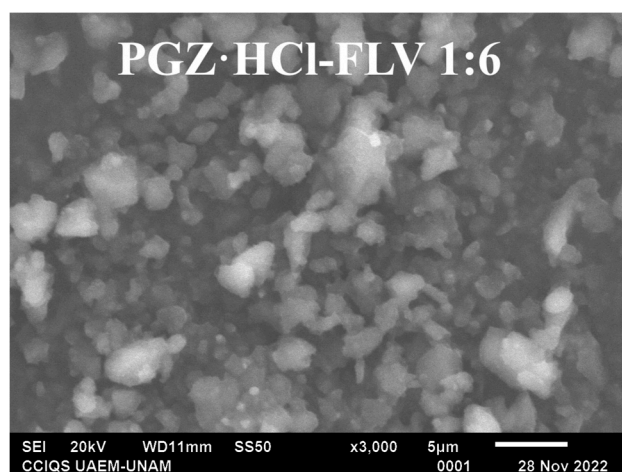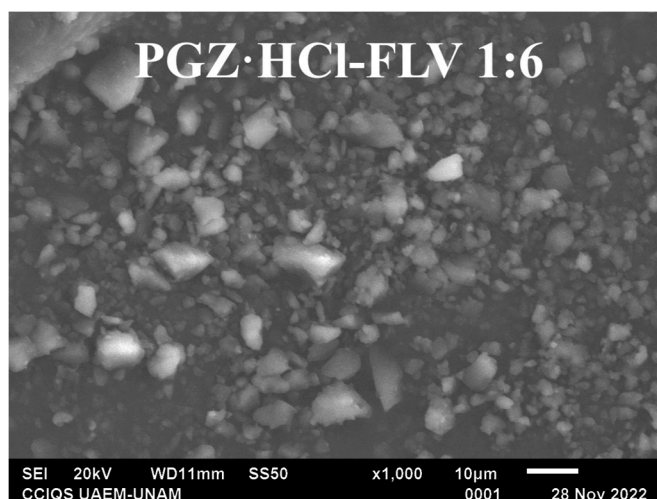

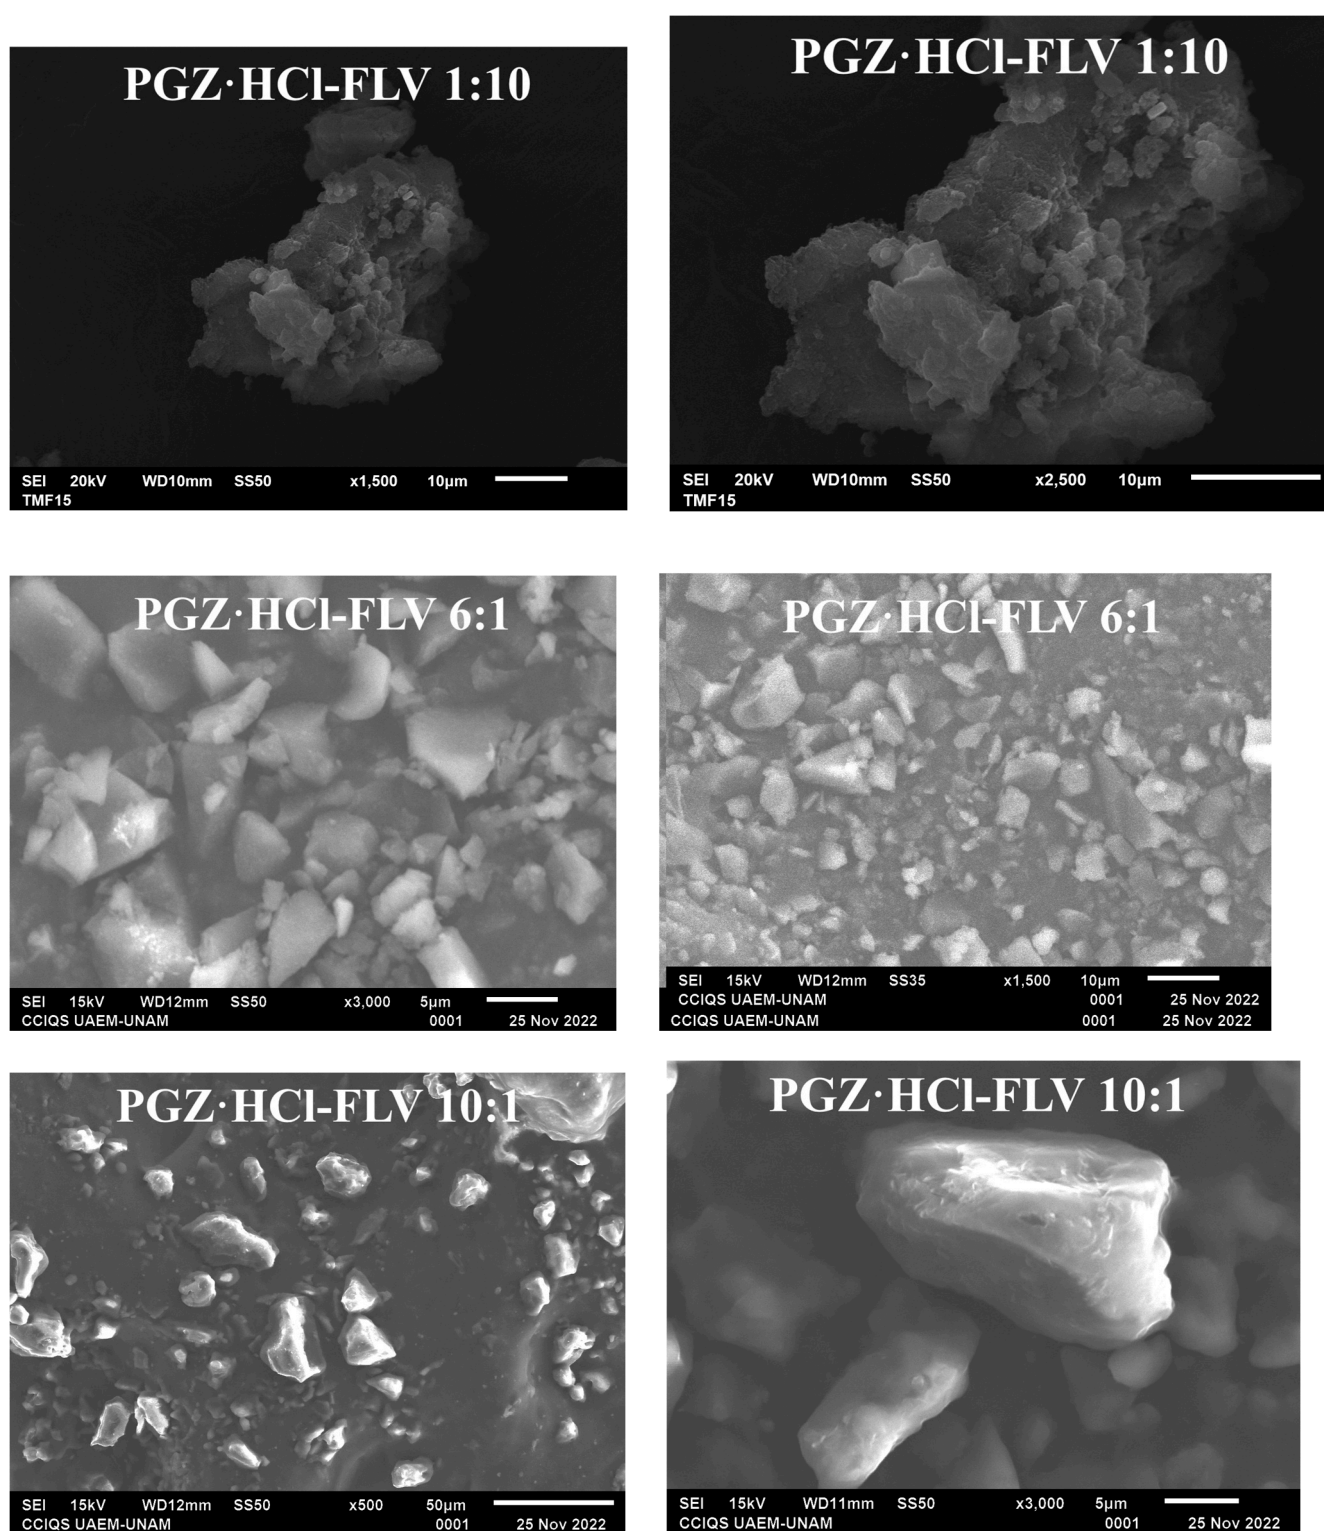

Figure SM13. Grain morphology images of the solid forms (1:1; 1:6; 1:10; 6:1; and 10:1)

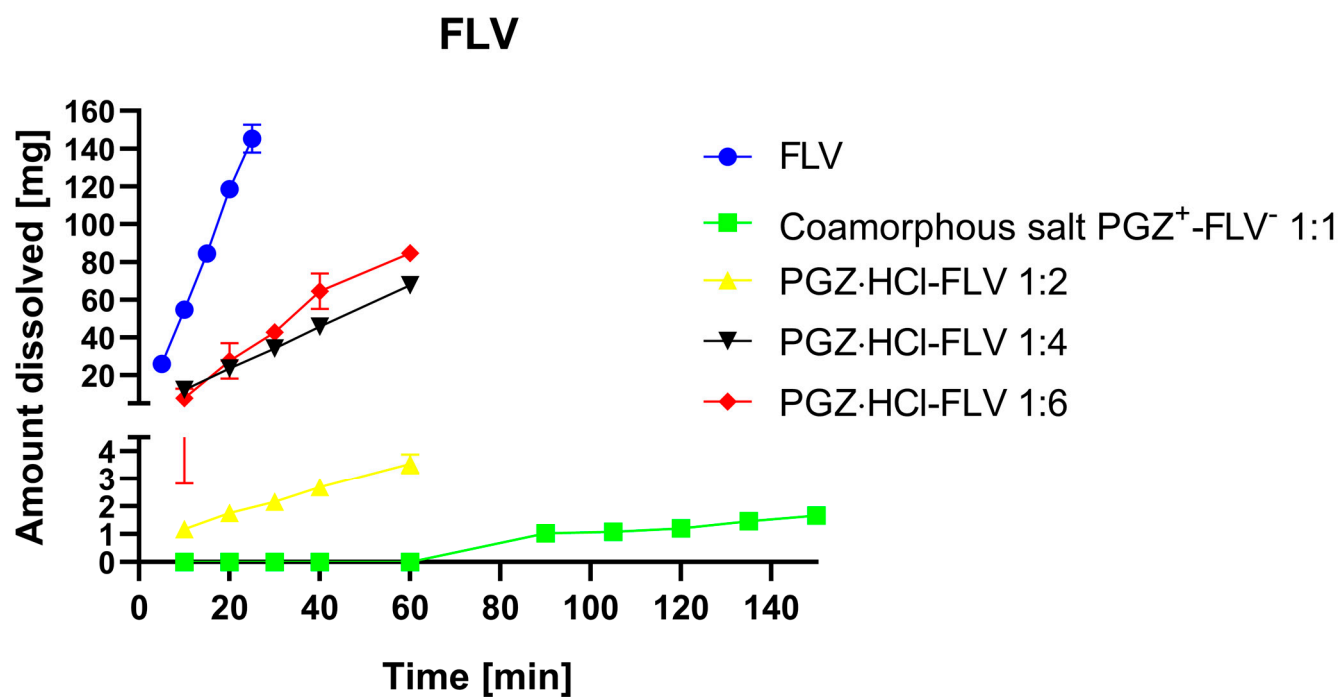

Figure SM14. Dissolution profiles with another scale on the y-axis show the plots in more detail.
